# Supplementary material
Source: ML conference proceedings conference paper supplement (https://openreview.net/forum?id=du7iixIeke)
Supplement: supplementary_material [file attachment]

## A PRELIMINARIES

A random variable  $X$  called a sub-Weibull random variable with tail parameter  $\theta$  and scale factor  $K$ , which is denoted by  $X \sim \text{subW}(\theta, K)$ . We next introduce the equivalent properties and theoretical tools of sub-Weibull distributions.

### A.1 PROPERTIES

**Definition A.1** (Sub-Weibull Equivalent Properties [Vladimirova et al. \(2020\)](#)). *Let  $X$  be a random variable and  $\theta \geq 0$ , and there exists some constant  $K_1, K_2, K_3, K_4$  depending on  $\theta$ . Then the following characterizations are equivalent:*

1. *The tails of  $X$  satisfy*

$$\exists K_1 > 0 \text{ such that } \mathbb{P}(|X| > t) \leq 2\exp(-(t/K_1)^{\frac{1}{\theta}}), \forall t > 0.$$

2. *The moments of  $X$  satisfy*

$$\exists K_2 > 0 \text{ such that } \|X\|_p \leq K_2 p^\theta, \forall k \geq 1.$$

3. *The moment generating function (MGF) of  $|X|^{\frac{1}{\theta}}$  satisfies*

$$\exists K_3 > 0 \text{ such that } \mathbb{E}[\exp((\lambda|X|^{\frac{1}{\theta}}))] \leq \exp((\lambda K_3)^{\frac{1}{\theta}}), \forall \lambda \in (0, 1/K_3).$$

4. *The MGF of  $|X|^{\frac{1}{\theta}}$  is bounded at some point,*

$$\exists K_4 > 0 \text{ such that } \mathbb{E}[\exp((|X|/K_4)^{\frac{1}{\theta}})] \leq 2.$$

### A.2 THEORETICAL TOOLS

Based on the properties of sub-Weibull variables, we have the following high probability bounds and concentration inequalities for heavier tails as theoretical tools. Besides, We define  $l_p$  norm as  $\|\cdot\|_p$ , for any  $p \geq 1$ .

**Lemma A.1.** *Let a variable  $X \sim \text{subW}(\theta, K)$ , for any  $\delta \in (0, 1)$ , then with probability  $(1 - \delta)$  we have*

$$|X| \leq K \log^\theta(2/\delta).$$

*Proof.* Let  $K_1 = K$  in Definition A.1, and take  $t = K \log^\theta(2/\delta)$ , then the inequality holds with probability  $1 - \delta$ .  $\square$

**Lemma A.2** ([Vladimirova et al. \(2020\)](#); [Madden et al. \(2020\)](#)). *Let  $X_1, \dots, X_n$  are  $\text{subW}(\theta, K_i)$  random variables with scale parameters  $K_1, \dots, K_n$ .  $\forall x \geq 0$ , we have*

$$\mathbb{P}\left(\sum_{i=1}^n X_i \geq x\right) \leq 2\exp\left(-\left(\frac{x}{g(\theta) \sum_{i=1}^n K_i}\right)^{\frac{1}{\theta}}\right)$$

where  $g(\theta) = (4e)^\theta$  for  $\theta \leq 1$  and  $g(\theta) = 2(2e\theta)^\theta$  for  $\theta \geq 1$ .

**Lemma A.3** (Sub-Weibull Freedman Inequality [Madden et al. \(2020\)](#)). *Let  $(\Omega, \mathcal{F}, (\mathcal{F}_i), \mathbb{P})$  be a filtered probability space. Let  $(\xi_i)$  and  $(K_i)$  be adapted to  $(\mathcal{F}_i)$ . Let  $n \in \mathbb{N}$ , then  $\forall i \in [n]$ , assume  $K_{i-1} \geq 0$ ,  $\mathbb{E}[\xi_i | \mathcal{F}_{i-1}] = 0$ , and  $\mathbb{E}[\exp((|\xi_i|/K_{i-1})^{\frac{1}{\theta}}) | \mathcal{F}_{i-1}] \leq 2$  where  $\theta \geq 1/2$ . If  $\theta > 1/2$ , assume there exists  $(m_i)$  such that  $K_{i-1} \leq m_i$ .*

*if  $\theta = 1/2$ , let  $a = 2$ , then  $\forall x, \beta \geq 0$ ,  $\alpha > 0$ , and  $\lambda \in [0, \frac{1}{2\alpha}]$ ,*

$$\mathbb{P}\left(\bigcup_{k \in [n]} \left\{ \sum_{i=1}^k \xi_i \geq x \text{ and } \sum_{i=1}^k aK_{i-1}^2 \leq \alpha \sum_{i=1}^k \xi_i + \beta \right\}\right) \leq \exp(-\lambda x + 2\lambda^2 \beta), \quad (3)$$

810 and  $\forall x, \beta, \lambda \geq 0$ ,

$$811 \mathbb{P} \left( \bigcup_{k \in [n]} \left\{ \sum_{i=1}^k \xi_i \geq x \text{ and } \sum_{i=1}^k aK_{i-1}^2 \leq \beta \right\} \right) \leq \exp(-\lambda x + \frac{\lambda^2}{2}\beta). \quad (4)$$

815 If  $\theta \in (\frac{1}{2}, 1]$ , let  $a = (4\theta)^{2\theta} e^2$  and  $b = (4\theta)^\theta e$ .  $\forall x, \beta \geq 0$ , and  $\alpha \geq b \max_{i \in [n]} m_i$ , and  $\lambda \in [0, \frac{1}{2\alpha}]$ ,

$$816 \mathbb{P} \left( \bigcup_{k \in [n]} \left\{ \sum_{i=1}^k \xi_i \geq x \text{ and } \sum_{i=1}^k aK_{i-1}^2 \leq \alpha \sum_{i=1}^k \xi_i + \beta \right\} \right) \leq \exp(-\lambda x + 2\lambda^2\beta), \quad (5)$$

820 and  $\forall x, \beta \geq 0$ , and  $\lambda \in [0, \frac{1}{b \max_{i \in [n]} m_i}]$ ,

$$821 \mathbb{P} \left( \bigcup_{k \in [n]} \left\{ \sum_{i=1}^k \xi_i \geq x \text{ and } \sum_{i=1}^k aK_{i-1}^2 \leq \beta \right\} \right) \leq \exp(-\lambda x + \frac{\lambda^2}{2}\beta). \quad (6)$$

826 If  $\theta > 1$ , let  $\delta \in (0, 1)$ . Let  $a = (2^{2\theta+1} + 2)\Gamma(2\theta + 1) + 2^{3\theta}\Gamma(3\theta + 1)/3$  and  $b = 2 \log n / \delta^{\theta-1}$ ,  
827 where  $\Gamma(x) = \int_0^\infty t^{x-1} e^{-t} dt$ .  $\forall x, \beta \geq 0$ ,  $\alpha \geq b \max_{i \in [n]} m_i$ , and  $\lambda \in [0, \frac{1}{2\alpha}]$ ,

$$828 \mathbb{P} \left( \bigcup_{k \in [n]} \left\{ \sum_{i=1}^k \xi_i \geq x \text{ and } \sum_{i=1}^k aK_{i-1}^2 \leq \alpha \sum_{i=1}^k \xi_i + \beta \right\} \right) \leq \exp(-\lambda x + 2\lambda^2\beta) + 2\delta, \quad (7)$$

832 and  $\forall x, \beta \geq 0$ , and  $\lambda \in [0, \frac{1}{b \max_{i \in [n]} m_i}]$ ,

$$833 \mathbb{P} \left( \bigcup_{k \in [n]} \left\{ \sum_{i=1}^k \xi_i \geq x \text{ and } \sum_{i=1}^k aK_{i-1}^2 \leq \beta \right\} \right) \leq \exp(-\lambda x + \frac{\lambda^2}{2}\beta) + 2\delta. \quad (8)$$

838 **Lemma A.4 (Zhang (2005))**. Let  $z_1, \dots, z_n$  be a sequence of random variables such that  $z_k$  may  
839 depend on the previous variables  $z_1, \dots, z_{k-1}$  for all  $k = 1, \dots, n$ . Consider a sequence of functionals  
840  $\xi_k(z_1, \dots, z_k)$ ,  $k = 1, \dots, n$ . Let  $\sigma_n^2 = \sum_{k=1}^n \mathbb{E}_{z_k} [(\xi_k - \mathbb{E}_{z_k}[\xi_k])^2]$  be the conditional variance.  
841 Assume  $|\xi_k - \mathbb{E}_{z_k}[\xi_k]| \leq b$  for each  $k$ . Let  $\rho \in (0, 1]$  and  $\delta \in (0, 1)$ . With probability at least  $1 - \delta$   
842 we have

$$843 \sum_{k=1}^n \xi_k - \sum_{k=1}^n \mathbb{E}_{z_k}[\xi_k] \leq \frac{\rho \sigma_n^2}{b} + \frac{b \log \frac{1}{\delta}}{\rho}. \quad (9)$$

847 **Lemma A.5 (Cutkosky & Mehta (2020))**. For any vector  $\mathbf{g} \in \mathbb{R}^d$ ,  $\langle \mathbf{g}, \|\mathbf{g}\|_2, \nabla L_S(\mathbf{w}) \rangle \geq$   
848  $\frac{\|\nabla L_S(\mathbf{w})\|_2}{3} - \frac{8\|\mathbf{g} - L_S(\mathbf{w})\|_2}{3}$ .

849 **Lemma A.6 (Madden et al. (2020))**. If  $X \sim \text{subW}(\theta, K)$ , then  $\mathbb{E}[|X^p|] \leq 2\Gamma(p\theta + 1)K^p \forall p > 0$ .  
850 In particular,  $\mathbb{E}[X^2] \leq 2\Gamma(2\theta + 1)K^2$ .

851 **Lemma A.7 (Bakhshizadeh et al. (2023))**. Suppose  $X_1, \dots, X_m \stackrel{d}{=} X$  are independent and identically  
852 distributed random variables whose right tails are captured by an increasing and continuous function  
853  $I : \mathbb{R} \rightarrow \mathbb{R}^{\geq 0}$  with the property  $I(x) = \mathcal{O}(x)$  as  $x \rightarrow \infty$ . Let  $X^L = X\mathbb{I}(X \leq L)$ ,  $S_m = \sum_{i=1}^m X_i$   
854 and  $Z^L := X^L - \mathbb{E}[X]$ . Define  $x_{\max} := \sup\{x \geq 0 : x \leq \eta v(mx, \eta) \frac{I(mx)}{mx}\}$ , then

$$855 \mathbb{P}(S_m - \mathbb{E}[S_m] > mx) \leq \begin{cases} \exp(-c_x \eta I(mx)) + m \exp(-I(mx)), & \text{if } x \geq x_{\max}, \\ \exp\left(-\frac{mx^2}{2v(mx_{\max}, \eta)}\right) + m \exp\left(-\frac{mx_{\max}^2(\eta)}{\eta v(mx_{\max}, \eta)}\right), & \text{if } 0 \leq x \leq x_{\max}, \end{cases} \quad (10)$$

862 where  $c_x = 1 - \frac{\eta v(mx, \eta) I(mx)}{2mx^2}$  and  $v(L, \eta) = \mathbb{E}[(Z^L)^2 \mathbb{I}(Z^L \leq 0) + (Z^L)^2 \exp(\eta \frac{I(L)}{L} Z^L) \mathbb{I}(Z^L >$   
863  $0)]$ ,  $\forall \beta \in (0, 1]$ .

**Lemma A.8** (Bakhshizadeh et al. (2023)). Consider the same settings as the ones in Lemma A.7. Assume  $\mathbb{E}[X_i] = 0$ , then  $\forall t \geq 0$  we have

$$\mathbb{P}(S_m > mt) \leq \exp\left(-\frac{mt^2}{2v(mt, \eta)}\right) + \exp(-\eta \max\{c_t, \frac{1}{2}\}I(mt)) + m\exp(-I(mt)). \quad (11)$$

**Lemma A.9** (Ahlsweede-Winter Inequality). Let  $Y$  be a random, symmetric, positive semi-definite  $d \times d$  matrix such that  $\|\mathbb{E}[Y]\|_2 \leq 1$ . Suppose  $\|Y\|_2 \leq R$  for some fixed scalar  $R \geq 1$ . Let  $Y_1, \dots, Y_m$  be independent copies of  $Y$  (i.e., independently sampled matrix with the same distribution as  $Y$ ). For any  $\mu \in (0, 1)$ , we have

$$\mathbb{P}\left(\left\|\frac{1}{m} \sum_{i=1}^m Y_i - \mathbb{E}[Y_i]\right\|_2 > \mu\right) \leq 2d \cdot \exp(-m\mu^2/4R).$$

### A.3 NOTATIONS

Table 4: Summary of notations

| Definition of Notations       |                                                            |
|-------------------------------|------------------------------------------------------------|
| $\mathbf{w}$                  | the model parameter                                        |
| $d$                           | the dimension of model parameters                          |
| $z$                           | the training sample                                        |
| $n$                           | the sample size                                            |
| $B$                           | the batch sample size                                      |
| $\ell$                        | the loss function                                          |
| $D D'$                        | the neighboring datasets                                   |
| $\epsilon_{\text{dp}}$        | the privacy budget for differential privacy                |
| $\epsilon_{\text{tr}}$        | the privacy budget for preserving traces                   |
| $\sigma_{\text{dp}}$          | the noise multiplier for differential privacy              |
| $\sigma_{\text{tr}}$          | the noise multiplier for preserving traces                 |
| $V_k$                         | $k$ -dimensional the random projection vector              |
| $K$                           | the variance-related positive constant                     |
| $\nabla L(\mathbf{w}_t)$      | $k$ -dimensional the random projection vector              |
| $T$                           | the iterations of training                                 |
| $\eta_t$                      | the learning rate in $t$ iteration                         |
| $\theta$                      | the heavy tail index                                       |
| $p$                           | the ratio of heavy tail                                    |
| $\lambda_{t,i}^{\text{tr}}$   | the empirical trace of the sample                          |
| $\hat{\lambda}_t^{\text{tr}}$ | the population trace for dividing heavy tail or light body |

## B CONVERGENCE OF HEAVY-TAILED DPSGD

**Theorem B.1 (Convergence of Heavy-tailed DPSGD).** *Under Assumptions 3.1 and 3.2, let  $\mathbf{w}_t$  be the iterate produced by Algorithm DPSGD with  $T = \mathcal{O}(\frac{n\epsilon}{\sqrt{d \log(1/\delta)}})$ ,  $T \geq 1$ , and  $\eta_t = \frac{1}{\sqrt{T}}$ . Define*

*$\hat{\sigma}_{\text{dp}}^2 := m_2 \frac{Tdc^2B^2 \log(1/\delta)}{n^2\epsilon^2}$ . If  $\theta = \frac{1}{2}$  and  $K \leq \hat{\sigma}_{\text{dp}}$ , then  $c = \max(4K \log^\theta(\sqrt{T}), \frac{19K \log^{\frac{1}{2}}(1/\delta)}{12})$ . If  $\theta = \frac{1}{2}$  and  $K \geq \hat{\sigma}_{\text{dp}}$ , then  $c = \max(4K \log^\theta(\sqrt{T}), 39K \log^{\frac{1}{2}}(2/\delta))$ . If  $\theta > \frac{1}{2}$ , then  $c = \max(4K \log^\theta(\sqrt{T}), 20K \log^\theta(2/\delta))$ . For any  $\delta \in (0, 1)$ , with probability  $1 - \delta$ , we have*

$$\frac{1}{T} \sum_{t=1}^T \min \{ \|\nabla L_S(\mathbf{w}_t)\|_2, \|\nabla L_S(\mathbf{w}_t)\|_2^2 \} \leq \mathcal{O}\left(\frac{d^{\frac{1}{4}} \log^{\frac{5}{4}}(T/\delta) \hat{\log}(T/\delta) \log^{2\theta}(\sqrt{T})}{(n\epsilon)^{\frac{1}{2}}}\right),$$

where  $\hat{\log}(T/\delta) := \log^{\max(0, \theta-1)}(T/\delta)$ .

*Proof.* We consider two cases:  $\nabla L_S(\mathbf{w}_t) \leq c/2$  and  $\nabla L_S(\mathbf{w}_t) \geq c/2$ . To simplify notation, we omit the subscript of privacy parameters throughout, such as  $\epsilon_{\text{dp}}$ .

We first consider the case  $\nabla L_S(\mathbf{w}_t) \leq c/2$ .

$$\begin{aligned} L_S(\mathbf{w}_{t+1}) - L_S(\mathbf{w}_t) &\leq \langle \mathbf{w}_{t+1} - \mathbf{w}_t, \nabla L_S(\mathbf{w}_t) \rangle + \frac{1}{2} \beta \|\mathbf{w}_{t+1} - \mathbf{w}_t\|^2 \\ &\leq -\eta_t \langle \bar{\mathbf{g}}_t + \zeta_t, \nabla L_S(\mathbf{w}_t) \rangle + \frac{1}{2} \beta \eta_t^2 \|\bar{\mathbf{g}}_t + \zeta_t\|^2 \\ &= -\eta_t \langle \bar{\mathbf{g}}_t - \mathbb{E}_t[\bar{\mathbf{g}}_t] + \mathbb{E}_t[\bar{\mathbf{g}}_t] - \nabla L_S(\mathbf{w}_t), \nabla L_S(\mathbf{w}_t) \rangle - \eta_t \langle \zeta_t, \nabla L_S(\mathbf{w}_t) \rangle \\ &\quad - \eta_t \|\nabla L_S(\mathbf{w}_t)\|^2 + \frac{1}{2} \beta \eta_t^2 \|\bar{\mathbf{g}}_t\|^2 + \frac{1}{2} \beta \eta_t^2 \|\zeta_t\|^2 + \beta \eta_t^2 \langle \bar{\mathbf{g}}_t, \zeta_t \rangle \\ &= -\eta_t \langle \bar{\mathbf{g}}_t - \mathbb{E}_t[\bar{\mathbf{g}}_t], \nabla L_S(\mathbf{w}_t) \rangle - \eta_t \langle \mathbb{E}_t[\bar{\mathbf{g}}_t] - \nabla L_S(\mathbf{w}_t), \nabla L_S(\mathbf{w}_t) \rangle - \eta_t \langle \zeta_t, \nabla L_S(\mathbf{w}_t) \rangle \\ &\quad - \eta_t \|\nabla L_S(\mathbf{w}_t)\|^2 + \frac{1}{2} \beta \eta_t^2 \|\bar{\mathbf{g}}_t\|^2 + \frac{1}{2} \beta \eta_t^2 \|\zeta_t\|^2 + \beta \eta_t^2 \langle \bar{\mathbf{g}}_t, \zeta_t \rangle \end{aligned} \tag{12}$$

Considering all  $T$  iterations, we get

$$\begin{aligned} \sum_{t=1}^T \eta_t \|\nabla L_S(\mathbf{w}_t)\|^2 &\leq L_S(\mathbf{w}_1) - L_S(\mathbf{w}_S) + \underbrace{\sum_{t=1}^T \frac{1}{2} \beta \eta_t^2 c^2}_{\text{Eq.1}} + \underbrace{\sum_{t=1}^T \frac{1}{2} \beta \eta_t^2 \|\zeta_t\|^2}_{\text{Eq.2}} + \underbrace{\sum_{t=1}^T \beta \eta_t^2 \langle \bar{\mathbf{g}}_t, \zeta_t \rangle}_{\text{Eq.2}} \\ &\quad - \underbrace{\sum_{t=1}^T \eta_t \langle \zeta_t, \nabla L_S(\mathbf{w}_t) \rangle}_{\text{Eq.3}} - \underbrace{\sum_{t=1}^T \eta_t \langle \bar{\mathbf{g}}_t - \mathbb{E}_t[\bar{\mathbf{g}}_t], \nabla L_S(\mathbf{w}_t) \rangle}_{\text{Eq.4}} - \underbrace{\sum_{t=1}^T \eta_t \langle \mathbb{E}_t[\bar{\mathbf{g}}_t] - \nabla L_S(\mathbf{w}_t), \nabla L_S(\mathbf{w}_t) \rangle}_{\text{Eq.5}} \end{aligned} \tag{13}$$

For Eq.1, Eq.2 and Eq.3, since  $\zeta_t \sim \mathbb{N}(0, c\sigma_{\text{dp}}\mathbb{I}_d)$ , according to sub-Gaussian properties and Lemma A.2, with probability at least  $1 - \delta$ , we have

$$\begin{aligned} \sum_{t=1}^T \frac{1}{2} \beta \eta_t^2 \|\zeta_t\|^2 &\leq 2\beta K^2 e \log(2/\delta) \sum_{t=1}^T \eta_t^2 \\ &\leq 2\beta m_2 e d \frac{Tc^2 B^2 \log^2(2/\delta)}{n^2 \epsilon^2} \sum_{t=1}^T \eta_t^2. \end{aligned} \tag{14}$$

Also, with probability at least  $1 - \delta$ , we get

$$\begin{aligned} \sum_{t=1}^T \beta \eta_t^2 \langle \bar{\mathbf{g}}_t, \zeta_t \rangle &\leq \sum_{t=1}^T \beta \eta_t^2 \|\bar{\mathbf{g}}_t\| \|\zeta_t\| \\ &\leq \sum_{t=1}^T 2\beta cK \sqrt{e} \log^{\frac{1}{2}}(2/\delta) \eta_t^2 \\ &\leq 2\beta \sqrt{em_2 T d} \frac{c^2 B \log(2/\delta)}{n\epsilon} \sum_{t=1}^T \eta_t^2. \end{aligned} \quad (15)$$

Due to  $\nabla L_S(\mathbf{w}_t) \leq c/2$ , for the term  $-\sum_{t=1}^T \eta_t \langle \zeta_t, \nabla L_S(\mathbf{w}_t) \rangle$ , with probability at least  $1 - \delta$ , we have

$$\begin{aligned} -\sum_{t=1}^T \eta_t \langle \zeta_t, \nabla L_S(\mathbf{w}_t) \rangle &\leq \sum_{t=1}^T \eta_t \|\zeta_t\| \|\nabla L_S(\mathbf{w}_t)\| \\ &\leq \sum_{t=1}^T 2cK \sqrt{e} \log^{\frac{1}{2}}(2/\delta) \eta_t \\ &\leq 2\sqrt{em_2 T d} \frac{c^2 B \log(2/\delta)}{n\epsilon} \sum_{t=1}^T \eta_t. \end{aligned} \quad (16)$$

Since  $\mathbb{E}_t[-\eta_t \langle \bar{\mathbf{g}}_t - \mathbb{E}_t[\bar{\mathbf{g}}_t], \nabla L_S(\mathbf{w}_t) \rangle] = 0$ , the sequence  $(-\eta_t \langle \bar{\mathbf{g}}_t - \mathbb{E}_t[\bar{\mathbf{g}}_t], \nabla L_S(\mathbf{w}_t) \rangle, t \in \mathbb{N})$  is a martingale difference sequence. Applying Lemma A.4, we define  $\xi_t = -\eta_t \langle \bar{\mathbf{g}}_t - \mathbb{E}_t[\bar{\mathbf{g}}_t], \nabla L_S(\mathbf{w}_t) \rangle$  and have

$$|\xi_t| \leq \eta_t (\|\bar{\mathbf{g}}_t\|_2 + \|\mathbb{E}_t[\bar{\mathbf{g}}_t]\|_2) \|\nabla L_S(\mathbf{w}_t)\|_2 \leq \eta_t c^2. \quad (17)$$

Applying  $\mathbb{E}_t[(\xi_t - \mathbb{E}_t \xi_t)^2] \leq \mathbb{E}_t[\xi_t^2]$ , we have

$$\begin{aligned} \sum_{t=1}^T \mathbb{E}_t[(\xi_t - \mathbb{E}_t \xi_t)^2] &\leq \sum_{t=1}^T \eta_t^2 \mathbb{E}_t[\|\bar{\mathbf{g}}_t - \mathbb{E}_t[\bar{\mathbf{g}}_t]\|_2^2 \|\nabla L_S(\mathbf{w}_t)\|_2^2] \\ &\leq 4c^2 \sum_{t=1}^T \eta_t^2 \|\nabla L_S(\mathbf{w}_t)\|_2^2. \end{aligned} \quad (18)$$

Then, with probability  $1 - \delta$ , we obtain

$$\sum_{t=1}^T \xi_t \leq \frac{\rho 4c^2 \sum_{t=1}^T \eta_t^2 \|\nabla L_S(\mathbf{w}_t)\|_2^2}{\eta_t c^2} + \frac{\eta_t c^2 \log(1/\delta)}{\rho}. \quad (19)$$

Next, to bound term Eq.5, we have

$$\sum_{t=1}^T \eta_t \langle \mathbb{E}_t[\bar{\mathbf{g}}_t] - \nabla L_S(\mathbf{w}_t), \nabla L_S(\mathbf{w}_t) \rangle \leq \frac{1}{2} \sum_{t=1}^T \eta_t \|\mathbb{E}_t[\bar{\mathbf{g}}_t] - \nabla L_S(\mathbf{w}_t)\|_2^2 + \frac{1}{2} \sum_{t=1}^T \eta_t \|\nabla L_S(\mathbf{w}_t)\|_2^2.$$

Setting  $a_t = \mathbb{I}_{\|\bar{\mathbf{g}}_t\|_2 > c}$  and  $b_t = \mathbb{I}_{\|\mathbf{g}_t - \nabla L_S(\mathbf{w}_t)\|_2 > \frac{c}{2}}$ , for term  $\|\mathbb{E}_t[\bar{\mathbf{g}}_t] - \nabla L_S(\mathbf{w}_t)\|_2$ , we have

$$\begin{aligned} \|\mathbb{E}_t[\bar{\mathbf{g}}_t] - \nabla L_S(\mathbf{w}_t)\|_2 &= \|\mathbb{E}_t[(\bar{\mathbf{g}}_t - \mathbf{g}_t) a_t]\|_2 \\ &= \|\mathbb{E}_t[(\mathbf{g}_t (\frac{c}{\|\mathbf{g}_t\|_2} - 1) a_t)]\|_2 \\ &\leq \mathbb{E}_t[\|\mathbf{g}_t (\frac{c}{\|\mathbf{g}_t\|_2} - 1) a_t\|_2] \\ &\leq \mathbb{E}_t[\|\mathbf{g}_t\|_2 - c | a_t] \\ &\leq \mathbb{E}_t[\|\mathbf{g}_t\|_2 - \|\nabla L_S(\mathbf{w}_t)\|_2 | a_t] \\ &\leq \mathbb{E}_t[\|\mathbf{g}_t - \nabla L_S(\mathbf{w}_t)\|_2 | a_t] \\ &\leq \mathbb{E}_t[\|\mathbf{g}_t - \nabla L_S(\mathbf{w}_t)\|_2 | b_t] \\ &\leq \sqrt{\mathbb{E}_t[\|\mathbf{g}_t - \nabla L_S(\mathbf{w}_t)\|_2^2 | a_t]} \mathbb{E}_t b_t^2. \end{aligned} \quad (20)$$

Applying Lemma A.6, we get  $\mathbb{E}_t[\|\mathbf{g}_t - \nabla L_S(\mathbf{w}_t)\|_2^2] \leq 2K^2\Gamma(2\theta + 1)$ . Then, for term  $\mathbb{E}_t b_t^2$ , with sub-Weibull properties and probability  $1 - \delta$  we have

$$\mathbb{E}_t b_t^2 = \mathbb{P}(\|\mathbf{g}_t - \nabla L_S(\mathbf{w}_t)\|_2 > \frac{c}{2}) \leq 2\exp(-(\frac{c}{4K})^{\frac{1}{\theta}}) \quad (21)$$

So, we get formula.(20) as

$$\sqrt{\mathbb{E}_t[\|\mathbf{g}_t - \nabla L_S(\mathbf{w}_t)\|_2^2] \mathbb{E}_t b_t^2} \leq 2\sqrt{K^2\Gamma(2\theta + 1)\exp(-(\frac{c}{4K})^{\frac{1}{\theta}})}. \quad (22)$$

Thus, for Eq.5, with probability  $1 - T\delta$  we finally obtain

$$\begin{aligned} & \sum_{t=1}^T \eta_t \langle \mathbb{E}_t[\bar{\mathbf{g}}_t] - \nabla L_S(\mathbf{w}_t), \nabla L_S(\mathbf{w}_t) \rangle \\ & \leq 2K^2\Gamma(2\theta + 1) \sum_{t=1}^T \eta_t \exp(-(\frac{c}{4K})^{\frac{1}{\theta}}) + \frac{1}{2} \sum_{t=1}^T \eta_t \|\nabla L_S(\mathbf{w}_t)\|_2^2. \end{aligned} \quad (23)$$

Combining Eq.1-5 with the inequality (10), with probability  $1 - 4\delta - T\delta$ , we have

$$\begin{aligned} \sum_{t=1}^T \eta_t \|\nabla L_S(\mathbf{w}_t)\|_2^2 & \leq L_S(\mathbf{w}_1) - L_S(\mathbf{w}_S) + \sum_{t=1}^T \frac{1}{2} \beta \eta_t^2 c^2 + 2\beta m_2 e d \frac{T c^2 B^2 \log^2(2/\delta)}{n^2 \epsilon^2} \sum_{t=1}^T \eta_t^2 \\ & + 2\beta \sqrt{em_2 T d} \frac{c^2 B \log(2/\delta)}{n\epsilon} \sum_{t=1}^T \eta_t^2 + 2\sqrt{em_2 T d} \frac{c^2 B \log(2/\delta)}{n\epsilon} \sum_{t=1}^T \eta_t + \frac{\eta_t c^2 \log(1/\delta)}{\rho} \\ & + \frac{4\rho c^2 \sum_{t=1}^T \eta_t^2 \|\nabla L_S(\mathbf{w}_t)\|_2^2}{\eta_t c^2} + 2K^2\Gamma(2\theta + 1)\exp(-(\frac{c}{4K})^{\frac{1}{\theta}}) \sum_{t=1}^T \eta_t + \frac{1}{2} \sum_{t=1}^T \eta_t \|\nabla L_S(\mathbf{w}_t)\|_2^2. \end{aligned} \quad (24)$$

Setting  $\rho = \frac{1}{16}$ ,  $T = \mathcal{O}(\frac{n\epsilon}{\sqrt{d \log(1/\delta)}})$  and  $\eta_t = \frac{1}{\sqrt{T}}$ , we have

$$\begin{aligned} \frac{1}{4} \sum_{t=1}^T \eta_t \|\nabla L_S(\mathbf{w}_t)\|_2^2 & \leq L_S(\mathbf{w}_1) - L_S(\mathbf{w}_S) + \frac{1}{2} \beta c^2 + 2\beta m_2 e \frac{d^{\frac{1}{2}} c^2 B^2 \log^{\frac{3}{2}}(2/\delta)}{n\epsilon} \\ & + 2\beta \sqrt{em_2} \frac{d^{\frac{1}{4}} c^2 B \log^{\frac{1}{2}}(2/\delta)}{\sqrt{n\epsilon}} + 2\sqrt{em_2} c^2 B \log^{\frac{1}{2}}(2/\delta) + \frac{16d^{\frac{1}{4}} c^2 \log^{\frac{5}{4}}(1/\delta)}{\sqrt{n\epsilon}} \\ & + \underbrace{2K^2\Gamma(2\theta + 1)\exp(-(\frac{c}{4K})^{\frac{1}{\theta}})\sqrt{T}}_{\text{Eq.6}}. \end{aligned} \quad (25)$$

Then, we pay attention to term Eq.6. If  $c \rightarrow 0$ , then  $\exp(-(\frac{c}{4K})^{\frac{1}{\theta}}) \rightarrow 1$  and  $\sqrt{T}$  will dominate term Eq.6. We know that in classical DPSGD, a small  $c$  is regarded as the clipping threshold guide, which will cause the variance term Eq.6 to dominate the entire bound. For this, we will provide guidance on the clipping values of DPSGD under the heavy-tailed assumption.

Let  $\exp(-(\frac{c}{4K})^{\frac{1}{\theta}}) \leq \frac{1}{\sqrt{T}}$ , then we have  $c \geq 4K \log^\theta(\sqrt{T})$ . So, we obtain

$$\begin{aligned} \sum_{t=1}^T \eta_t \|\nabla L_S(\mathbf{w}_t)\|_2^2 & \leq 4(L_S(\mathbf{w}_1) - L_S(\mathbf{w}_S)) + 2\beta c^2 + 8\beta m_2 e \frac{d^{\frac{1}{2}} c^2 B^2 \log^{\frac{3}{2}}(2/\delta)}{n\epsilon} \\ & + 8\beta \sqrt{em_2} \frac{d^{\frac{1}{4}} c^2 B \log^{\frac{1}{2}}(2/\delta)}{\sqrt{n\epsilon}} + 8\sqrt{em_2} c^2 B \log^{\frac{1}{2}}(2/\delta) + \frac{64d^{\frac{1}{4}} c^2 \log^{\frac{5}{4}}(1/\delta)}{\sqrt{n\epsilon}} + 8K^2\Gamma(2\theta + 1). \end{aligned} \quad (26)$$

1080 Multiplying  $\frac{1}{\sqrt{T}}$  on both sides, we get

$$1081 \frac{1}{\sqrt{T}} \sum_{t=1}^T \eta_t \|\nabla L_S(\mathbf{w}_t)\|_2^2 \leq \frac{1}{\sqrt{T}} \left( 4(L_S(\mathbf{w}_1) - L_S(\mathbf{w}_S)) + 2\beta c^2 + 8\beta m_2 e \frac{d^{\frac{1}{2}} c^2 B^2 \log^{\frac{3}{2}}(2/\delta)}{n\epsilon} \right. \\ 1082 + 8\beta \sqrt{em_2} \frac{d^{\frac{1}{4}} c^2 B \log^{\frac{1}{2}}(2/\delta)}{\sqrt{n\epsilon}} + 8\sqrt{em_2} c^2 B \log^{\frac{1}{2}}(2/\delta) + \frac{64d^{\frac{1}{4}} c^2 \log^{\frac{5}{4}}(1/\delta)}{\sqrt{n\epsilon}} + 8K^2 \Gamma(2\theta + 1) \left. \right). \quad (27)$$

1088 Taking  $c = 4K \log^\theta(\sqrt{T})$ , due to  $T \geq 1$ , we achieve

$$1089 \frac{1}{\sqrt{T}} \sum_{t=1}^T \eta_t \|\nabla L_S(\mathbf{w}_t)\|_2^2 \leq \frac{4(L_S(\mathbf{w}_1) - L_S(\mathbf{w}_S))}{\sqrt{T}} + \frac{8K^2 \Gamma(2\theta + 1)}{\sqrt{T}} \\ 1090 + \frac{16K^2 \log^{2\theta}(\sqrt{T}) \log(2/\delta)}{\sqrt{T}} \left( 2\beta + 8\beta m_2 e \frac{d^{\frac{1}{2}} B^2 \log^{\frac{1}{2}}(2/\delta)}{n\epsilon} \right. \\ 1091 + 8\beta \sqrt{em_2} \frac{d^{\frac{1}{4}} B \log^{-\frac{1}{2}}(2/\delta)}{\sqrt{n\epsilon}} + 8\sqrt{em_2} B \log^{-\frac{1}{2}}(2/\delta) + \frac{64d^{\frac{1}{4}} \log^{\frac{1}{4}}(1/\delta)}{\sqrt{n\epsilon}} \left. \right) \\ 1092 \leq \mathcal{O}\left(\frac{\log^{2\theta}(\sqrt{T}) \log(1/\delta)}{\sqrt{T}} \cdot \frac{d^{\frac{1}{4}} \log^{\frac{1}{4}}(1/\delta)}{\sqrt{n\epsilon}}\right) \\ 1093 \leq \mathcal{O}\left(\frac{\log^{2\theta}(\sqrt{T}) \log(1/\delta) d^{\frac{1}{4}} \log^{\frac{1}{4}}(1/\delta)}{\sqrt{n\epsilon}}\right). \quad (28)$$

1094 Due to  $\frac{1}{T} \sum_{t=1}^T \|\nabla L_S(\mathbf{w}_t)\|_2^2 \leq \frac{1}{\sqrt{T}} \sum_{t=1}^T \eta_t \|\nabla L_S(\mathbf{w}_t)\|_2^2$ , we have

$$1095 \frac{1}{T} \sum_{t=1}^T \|\nabla L_S(\mathbf{w}_t)\|_2^2 \leq \mathcal{O}\left(\frac{d^{\frac{1}{4}} \log^{2\theta}(\sqrt{T}) \log^{\frac{5}{4}}(1/\delta)}{(n\epsilon)^{\frac{1}{2}}}\right), \quad (29)$$

1096 with probability  $1 - T\delta - 4\delta$ .

1097 By substitution, with probability  $1 - \delta$ , we get

$$1098 \frac{1}{T} \sum_{t=1}^T \|\nabla L_S(\mathbf{w}_t)\|_2^2 \leq \mathcal{O}\left(\frac{d^{\frac{1}{4}} \log^{2\theta}(\sqrt{T}) \log^{\frac{5}{4}}(T/\delta)}{(n\epsilon)^{\frac{1}{2}}}\right). \quad (30)$$

1099 Secondly, we consider the case  $\nabla L_S(\mathbf{w}_t) \geq c/2$ .

$$1100 L_S(\mathbf{w}_{t+1}) - L_S(\mathbf{w}_t) \leq \langle \mathbf{w}_{t+1} - \mathbf{w}_t, \nabla L_S(\mathbf{w}_t) \rangle + \frac{1}{2} \beta \|\mathbf{w}_{t+1} - \mathbf{w}_t\|_2^2 \\ 1101 \leq \underbrace{-\eta_t \langle \bar{\mathbf{g}}_t + \zeta_t, \nabla L_S(\mathbf{w}_t) \rangle}_{\text{Eq.7}} + \underbrace{\frac{1}{2} \beta \eta_t^2 \|\bar{\mathbf{g}}_t + \zeta_t\|_2^2}_{\text{Eq.8}} \quad (31)$$

1102 We have discussed term Eq.8 in the above case, so we focus on Eq.7 here. Setting  $s_t^+ = \mathbb{I}_{\|\mathbf{g}_t\|_2 \geq c}$  and  $s_t^- = \mathbb{I}_{\|\mathbf{g}_t\|_2 \leq c}$ .

$$1103 -\eta_t \langle \bar{\mathbf{g}}_t + \zeta_t, \nabla L_S(\mathbf{w}_t) \rangle \\ 1104 = -\eta_t \left\langle \frac{c\mathbf{g}_t}{\|\mathbf{g}_t\|_2} s_t^+ + \mathbf{g}_t s_t^-, \nabla L_S(\mathbf{w}_t) \right\rangle - \eta_t \langle \zeta_t, \nabla L_S(\mathbf{w}_t) \rangle. \quad (32)$$

1105 Applying Lemma A.5 to term  $-\eta_t \left\langle \frac{c\mathbf{g}_t}{\|\mathbf{g}_t\|_2} s_t^+, \nabla L_S(\mathbf{w}_t) \right\rangle$ , we have

$$1106 -\eta_t \left\langle \frac{c\mathbf{g}_t}{\|\mathbf{g}_t\|_2} s_t^+, \nabla L_S(\mathbf{w}_t) \right\rangle \leq -\frac{c\eta_t s_t^+ \|\nabla L_S(\mathbf{w}_t)\|_2}{3} + \frac{8c\eta_t \|\mathbf{g}_t - \nabla L_S(\mathbf{w}_t)\|_2}{3} \\ 1107 \leq -\frac{c\eta_t (1 - s_t^-) \|\nabla L_S(\mathbf{w}_t)\|_2}{3} + \frac{8c\eta_t \|\mathbf{g}_t - \nabla L_S(\mathbf{w}_t)\|_2}{3}. \quad (33)$$

For term  $-\eta_t \langle \mathbf{g}_t s_t^-, \nabla L_S(\mathbf{w}_t) \rangle$ , we obtain

$$\begin{aligned}
-\eta_t \langle \mathbf{g}_t s_t^-, \nabla L_S(\mathbf{w}_t) \rangle &= -\eta_t s_t^- (\langle \mathbf{g}_t - \nabla L_S(\mathbf{w}_t), \nabla L_S(\mathbf{w}_t) \rangle + \|\nabla L_S(\mathbf{w}_t)\|_2^2) \\
&\leq -\eta_t s_t^- (-\|\mathbf{g}_t - \nabla L_S(\mathbf{w}_t)\|_2 \|\nabla L_S(\mathbf{w}_t)\|_2 + \|\nabla L_S(\mathbf{w}_t)\|_2^2) \\
&\leq \eta_t \|\mathbf{g}_t - \nabla L_S(\mathbf{w}_t)\|_2 \|\nabla L_S(\mathbf{w}_t)\|_2 - \frac{c}{2} \eta_t s_t^- \|\nabla L_S(\mathbf{w}_t)\|_2 \\
&\leq \eta_t \|\mathbf{g}_t - \nabla L_S(\mathbf{w}_t)\|_2 \|\nabla L_S(\mathbf{w}_t)\|_2 - \frac{c}{3} \eta_t s_t^- \|\nabla L_S(\mathbf{w}_t)\|_2. \tag{34}
\end{aligned}$$

According to Lemma A.1, with probability at least  $1 - \delta$ , we have

$$\|\mathbf{g}_t - \nabla L_S(\mathbf{w}_t)\|_2 \leq K \log^\theta(2/\delta), \tag{35}$$

then we get

$$-\eta_t \langle \mathbf{g}_t s_t^-, \nabla L_S(\mathbf{w}_t) \rangle \leq K \log^\theta(2/\delta) \|\nabla L_S(\mathbf{w}_t)\|_2 - \frac{c}{3} \eta_t s_t^- \|\nabla L_S(\mathbf{w}_t)\|_2, \tag{36}$$

and

$$-\eta_t \langle \frac{c\mathbf{g}_t}{\|\mathbf{g}_t\|_2} s_t^+, \nabla L_S(\mathbf{w}_t) \rangle \leq -\frac{c\eta_t(1-s_t^-) \|\nabla L_S(\mathbf{w}_t)\|_2}{3} + \frac{8c\eta_t K \log^\theta(2/\delta)}{3}. \tag{37}$$

Using Lemma A.2 to term  $-\sum_{t=1}^T \eta_t \langle \zeta_t, \nabla L_S(\mathbf{w}_t) \rangle$ , with probability at least  $1 - \delta$ , we have

$$-\sum_{t=1}^T \eta_t \langle \zeta_t, \nabla L_S(\mathbf{w}_t) \rangle \leq 4\sqrt{em_2 T d} \frac{cB \log(2/\delta)}{n\epsilon} \sum_{t=1}^T \eta_t \|\nabla L_S(\mathbf{w}_t)\|_2. \tag{38}$$

So, combining formula.(35), formula.(37) and formula.(38) with term Eq.7, with probability at least  $1 - 2\delta - T\delta$ , we obtain

$$\begin{aligned}
-\sum_{t=1}^T \eta_t \langle \bar{\mathbf{g}}_t + \zeta_t, \nabla L_S(\mathbf{w}_t) \rangle &\leq -\sum_{t=1}^T \frac{c\eta_t}{3} \|\nabla L_S(\mathbf{w}_t)\|_2 + \sum_{t=1}^T \frac{8c\eta_t K \log^\theta(2/\delta)}{3} \\
&+ K \log^\theta(2/\delta) \sum_{t=1}^T \eta_t \|\nabla L_S(\mathbf{w}_t)\|_2 + 4\sqrt{em_2 T d} \frac{cB \log(2/\delta)}{n\epsilon} \sum_{t=1}^T \eta_t \|\nabla L_S(\mathbf{w}_t)\|_2 \\
&\leq -\sum_{t=1}^T \frac{c\eta_t}{3} \|\nabla L_S(\mathbf{w}_t)\|_2 + \left( \frac{19}{3} K \log^\theta(2/\delta) + 4\sqrt{em_2 T d} \frac{cB \log(2/\delta)}{n\epsilon} \right) \sum_{t=1}^T \eta_t \|\nabla L_S(\mathbf{w}_t)\|_2. \tag{39}
\end{aligned}$$

Next, considering all  $T$  iterations and term Eq.8 with  $\hat{\sigma}_{\text{dp}}^2 := dc^2 \sigma_{\text{dp}}^2 = m_2 \frac{Tdc^2 B^2 \log(1/\delta)}{n^2 \epsilon^2}$  and probability  $1 - 4\delta - T\delta$ , we have

$$\begin{aligned}
\left( \frac{c}{3} - \frac{19}{3} K \log^\theta(2/\delta) - 4\sqrt{e} \hat{\sigma}_{\text{dp}} \log^{\frac{1}{2}}(1/\delta) \right) \sum_{t=1}^T \eta_t \|\nabla L_S(\mathbf{w}_t)\|_2 &\leq L_S(\mathbf{w}_1) - L_S(\mathbf{w}_S) \\
+ (2\beta m_2 e d \frac{Tc^2 B^2 \log^2(2/\delta)}{n^2 \epsilon^2} + 2\beta \sqrt{em_2 T d} \frac{c^2 B \log(2/\delta)}{n\epsilon} + \frac{1}{2} \beta c^2) \sum_{t=1}^T \eta_t^2. \tag{40}
\end{aligned}$$



If  $\theta = \frac{1}{2}$  and  $K \geq \hat{\sigma}_{\text{dp}}$ , let  $\frac{c}{3} \geq \frac{39}{3}K \log^{\frac{1}{2}}(2/\delta)$ , i.e.  $c \geq 39K \log^{\frac{1}{2}}(2/\delta)$ , taking  $c = 39K \log^{\frac{1}{2}}(2/\delta)$ ,  $T = \mathcal{O}(\frac{n\epsilon}{\sqrt{d \log(1/\delta)}})$  and  $\eta_t = \frac{1}{\sqrt{T}}$ , we have

$$\begin{aligned}
\sum_{t=1}^T \eta_t \|\nabla L_S(\mathbf{w}_t)\|_2 &\leq \frac{3}{K \log^{\frac{1}{2}}(2/\delta)} (L_S(\mathbf{w}_1) - L_S(\mathbf{w}_S)) \\
&+ \frac{3 \sum_{t=1}^T \eta_t^2}{K \log^{\frac{1}{2}}(2/\delta)} \left( 2\beta m_2 e d \frac{T c^2 B^2 \log^2(2/\delta)}{n^2 \epsilon^2} + 2\beta \sqrt{e m_2 T d} \frac{c^2 B \log(2/\delta)}{n \epsilon} + \frac{1}{2} \beta c^2 \right) \\
&\leq \frac{L_S(\mathbf{w}_1) - L_S(\mathbf{w}_S) + 2\beta e \hat{\sigma}_{\text{dp}}^2 \log(2/\delta) + 2\beta c \sqrt{e} \hat{\sigma}_{\text{dp}} \log^{\frac{1}{2}}(2/\delta) + \frac{39^2}{2} \beta K^2 \log(2/\delta)}{\frac{1}{3} K \log^{\frac{1}{2}}(2/\delta)} \\
&\leq \frac{3(L_S(\mathbf{w}_1) - L_S(\mathbf{w}_S))}{K \log^{\frac{1}{2}}(2/\delta)} + 6\beta e K \log^{\frac{1}{2}}(2/\delta) + 6\beta \sqrt{e} \log^{\frac{1}{2}}(2/\delta) + 3\beta \frac{(39)^2}{2} K \log^{\frac{1}{2}}(2/\delta).
\end{aligned} \tag{41}$$

Thus, with probability  $1 - 4\delta - T\delta$ , we have

$$\frac{1}{T} \sum_{t=1}^T \|\nabla L_S(\mathbf{w}_t)\|_2 \leq \frac{1}{\sqrt{T}} \sum_{t=1}^T \eta_t \|\nabla L_S(\mathbf{w}_t)\|_2 \leq \mathcal{O}\left(\frac{\log^{\frac{1}{2}}(1/\delta)}{\sqrt{T}}\right) = \mathcal{O}\left(\frac{\log^{\frac{1}{2}}(1/\delta) d^{\frac{1}{4}} \log^{\frac{1}{4}}(1/\delta)}{\sqrt{n\epsilon}}\right),$$

implying that with probability  $1 - \delta$ , we have

$$\frac{1}{T} \sum_{t=1}^T \|\nabla L_S(\mathbf{w}_t)\|_2 \leq \mathcal{O}\left(\frac{d^{\frac{1}{4}} \log^{\frac{3}{4}}(T/\delta)}{\sqrt{n\epsilon}}\right). \tag{42}$$

If  $\theta = \frac{1}{2}$  and  $K \leq \hat{\sigma}_{\text{dp}}$ , that is,  $c \geq \frac{19 \log^{\frac{1}{2}}(1/\delta) K}{12}$ , thus there exists  $T = \mathcal{O}(\frac{n\epsilon}{\sqrt{d \log(1/\delta)}})$ ,  $T \geq 1$  and  $\eta_t = \frac{1}{\sqrt{T}}$  that we obtain

$$\begin{aligned}
\sum_{t=1}^T \eta_t \|\nabla L_S(\mathbf{w}_t)\|_2 &\leq \frac{1}{\sqrt{e} \hat{\sigma}_{\text{dp}} \log^{\frac{1}{2}}(1/\delta)} (L_S(\mathbf{w}_1) - L_S(\mathbf{w}_S)) \\
&+ \frac{\sum_{t=1}^T \eta_t^2}{\sqrt{e} \hat{\sigma}_{\text{dp}} \log^{\frac{1}{2}}(1/\delta)} \left( 2\beta m_2 e d \frac{T c^2 B^2 \log^2(2/\delta)}{n^2 \epsilon^2} + 2\beta \sqrt{e m_2 T d} \frac{c^2 B \log(2/\delta)}{n \epsilon} + \frac{1}{2} \beta c^2 \right) \\
&\leq \frac{1}{\sqrt{e} \hat{\sigma}_{\text{dp}} \log^{\frac{1}{2}}(1/\delta)} (L_S(\mathbf{w}_1) - L_S(\mathbf{w}_S)) \\
&+ \frac{\sum_{t=1}^T \eta_t^2}{\sqrt{e} \hat{\sigma}_{\text{dp}} \log^{\frac{1}{2}}(1/\delta)} \left( 2\beta e \hat{\sigma}_{\text{dp}}^2 \log(2/\delta) + 2\beta \sqrt{e} \hat{\sigma}_{\text{dp}} \log^{\frac{1}{2}}(2/\delta) + \frac{27^2}{2} \beta e \hat{\sigma}_{\text{dp}}^2 \log(2/\delta) \right) \\
&\leq \frac{L_S(\mathbf{w}_1) - L_S(\mathbf{w}_S)}{K \log^{\frac{1}{2}}(2/\delta)} + 2\beta e K \log^{\frac{1}{2}}(2/\delta) + 2\beta \sqrt{e} \log^{\frac{1}{2}}(2/\delta) + \beta \frac{(27)^2}{2} K \log^{\frac{1}{2}}(2/\delta).
\end{aligned} \tag{43}$$

Therefore, with probability  $1 - 4\delta - T\delta$ , we have

$$\frac{1}{T} \sum_{t=1}^T \|\nabla L_S(\mathbf{w}_t)\|_2 \leq \mathcal{O}\left(\frac{\log^{\frac{1}{2}}(1/\delta) d^{\frac{1}{4}} \log^{\frac{1}{4}}(1/\delta)}{\sqrt{n\epsilon}}\right),$$

then, with probability  $1 - \delta$ , we have

$$\frac{1}{T} \sum_{t=1}^T \|\nabla L_S(\mathbf{w}_t)\|_2 \leq \mathcal{O}\left(\frac{d^{\frac{1}{4}} \log^{\frac{3}{4}}(T/\delta)}{\sqrt{n\epsilon}}\right). \tag{44}$$

If  $\theta > \frac{1}{2}$ , then term  $\log^\theta(2/\delta)$  dominates the left-hand inequality, i.e.  $\frac{19}{3}K \log^\theta(2/\delta) \geq 4\sqrt{\epsilon}\hat{\sigma}_{\text{dp}} \log^{\frac{1}{2}}(1/\delta)$ . Let  $\frac{c}{3} \geq \frac{20}{3}K \log^\theta(2/\delta)$ ,  $T = \mathbb{O}(\frac{n\epsilon}{\sqrt{d \log(1/\delta)}})$  and  $\eta_t = \frac{1}{\sqrt{T}}$ , we obtain

$$\begin{aligned} \sum_{t=1}^T \eta_t \|\nabla L_S(\mathbf{w}_t)\|_2 &\leq \frac{3}{K \log^\theta(2/\delta)} (L_S(\mathbf{w}_1) - L_S(\mathbf{w}_S)) \\ &+ \frac{3 \sum_{t=1}^T \eta_t^2}{K \log^\theta(2/\delta)} \left( 2\beta m_2 \epsilon d \frac{T c^2 B^2 \log^2(2/\delta)}{n^2 \epsilon^2} + 2\beta \sqrt{\epsilon m_2 T d} \frac{c^2 B \log(2/\delta)}{n \epsilon} + \frac{1}{2} \beta c^2 \right) \\ &\leq \frac{3(L_S(\mathbf{w}_1) - L_S(\mathbf{w}_S))}{K \log^\theta(2/\delta)} + \frac{19^2}{24} \beta K \log^\theta(2/\delta) + 190 \beta K \log^\theta(2/\delta) + 3\beta(20)^2 K \log^\theta(2/\delta). \end{aligned} \quad (45)$$

Consequently, with probability  $1 - \delta$ , we have

$$\frac{1}{T} \sum_{t=1}^T \|\nabla L_S(\mathbf{w}_t)\|_2 \leq \mathbb{O}\left(\frac{\log^\theta(T/\delta) d^{\frac{1}{4}} \log^{\frac{1}{4}}(T/\delta)}{\sqrt{n\epsilon}}\right). \quad (46)$$

Integrating the above results, when  $\nabla L_S(\mathbf{w}_t) \geq c/2$  we have

$$\frac{1}{T} \sum_{t=1}^T \|\nabla L_S(\mathbf{w}_t)\|_2 \leq \mathbb{O}\left(\frac{d^{\frac{1}{4}} \log^{\theta+\frac{1}{4}}(T/\delta)}{\sqrt{n\epsilon}}\right), \quad (47)$$

with probability  $1 - \delta$  and  $\theta \geq \frac{1}{2}$ .

To sum up, covering the two cases, we ultimately come to the conclusion with probability  $1 - \delta$ ,  $T = \mathbb{O}(\frac{n\epsilon}{\sqrt{d \log(1/\delta)}})$ ,  $T \geq 1$ , and  $\eta_t = \frac{1}{\sqrt{T}}$

$$\begin{aligned} \frac{1}{T} \sum_{t=1}^T \min \{ \|\nabla L_S(\mathbf{w}_t)\|_2, \|\nabla L_S(\mathbf{w}_t)\|_2^2 \} &\leq \mathbb{O}\left(\frac{d^{\frac{1}{4}} \log^{\theta+\frac{1}{4}}(T/\delta)}{(n\epsilon)^{\frac{1}{2}}}\right) + \mathbb{O}\left(\frac{d^{\frac{1}{4}} \log^{2\theta}(\sqrt{T}) \log^{\frac{5}{4}}(T/\delta)}{(n\epsilon)^{\frac{1}{2}}}\right) \\ &\leq \mathbb{O}\left(\frac{d^{\frac{1}{4}} \log^{\frac{5}{4}}(T/\delta) (\log^{\theta-1}(T/\delta) + \log^{2\theta}(\sqrt{T}))}{(n\epsilon)^{\frac{1}{2}}}\right) \\ &\leq \mathbb{O}\left(\frac{d^{\frac{1}{4}} \log^{\frac{5}{4}}(T/\delta) \hat{\log}(T/\delta) \log^{2\theta}(\sqrt{T})}{(n\epsilon)^{\frac{1}{2}}}\right), \end{aligned} \quad (48)$$

where  $\hat{\log}(T/\delta) = \log^{\max(0, \theta-1)}(T/\delta)$ . If  $\theta = \frac{1}{2}$  and  $K \leq \hat{\sigma}_{\text{dp}}$ , then  $c = \max(4K \log^\theta(\sqrt{T}), \frac{19K \log^{\frac{1}{2}}(1/\delta)}{12})$ . If  $\theta = \frac{1}{2}$  and  $K \geq \hat{\sigma}_{\text{dp}}$ , then  $c = \max(4K \log^\theta(\sqrt{T}), 39K \log^{\frac{1}{2}}(2/\delta))$ . If  $\theta > \frac{1}{2}$ , then  $c = \max(4K \log^\theta(\sqrt{T}), 20K \log^\theta(2/\delta))$ .  $\square$

The proof of Theorem 4.1 is completed.

## C PRIVACY GUARANTEE

We provide the complete privacy guarantee proof of Theorem 5.1 for our differential private mechanism  $M'$ :  $\text{Subsample} \circ \text{TraceSorting}$  (TS)  $\circ$   $\text{GradientPerturbation}$  (GP). The specific proof process is as follows, and our proof comprehensively encompasses mechanism  $M'$ :

- **TraceSorting:** We prove that TraceSorting is  $(\epsilon_{\text{tr}}, \delta_{\text{tr}})$ -DP.
- **TraceSorting  $\circ$  GradientPerturbation:** We prove that based on the results of TraceSorting, with two different clipping threshold, the unified composition of TraceSorting and GradientPerturbation is  $(\epsilon_{\text{tr}} + \epsilon_{\text{dp}}, \delta)$ -DP, where  $\delta = \delta_{\text{tr}} + \delta_{\text{dp}}$ .
- **Subsample  $\circ$  TraceSorting  $\circ$  GradientPerturbation:** We prove that, under the premise of subsampling, the privacy amplification effect remains valid for our composition mechanism.

(1) Firstly, we show the TS with Gaussian noise here is  $(\epsilon_{\text{tr}}, \delta_{\text{tr}})$ -DP and follow the proof of Report Noisy Argmax (RNA) in Claim 3.9 [Dwork et al. \(2014\)](#) to clarify that.

*Proof.* Our trace sorting is to choose traces ranked from 1 to  $pB$ . To prove that this process satisfies differential privacy (DP), we need to demonstrate that the method of Report  $i$ -th Noisy Argmax for any  $i \in \mathbb{Z}^+$  and  $i \in (0, m]$  is  $(\epsilon_{\text{tr}}, \delta_{\text{tr}})$ -DP, where  $m$  is sample size. Fix the neighboring datasets  $D = D' \cup \{a\}$ . Let  $\lambda$ , respectively  $\lambda'$ , denote the vector of traces when the dataset is  $D$ , respectively  $D'$ . We have discussed the default  $L_2$  sensitivity is 1 and use two properties:

1. **Monotonicity of Traces.** For all  $j \in [m]$ ,  $\lambda_j \geq \lambda'_j$ ;
2. **Lipschitz Property.** For all  $j \in [m]$ ,  $1 + \lambda'_j \geq \lambda_j$ .

Fix any  $i \in [m]$ . We will bound from above and below the ratio of the probabilities that  $i$  is selected with  $D$  and with  $D'$ . Fix  $r_{-i}^+$ , a set from  $\text{Gauss}(1/\epsilon_{\text{tr}})^{m-i}$  used for all the noisy traces greater than the  $i$ -th trace. Defines  $r_{-i}^-$ , a set from  $\text{Gauss}(1/\epsilon_{\text{tr}})^{i-1}$  used for all the noisy traces less than the  $i$ -th trace. We will argue for each  $r_{-i} = r_{-i}^+ \cup r_{-i}^-$  independently. We use the notation  $\mathbb{P}[i \mid \xi]$  to mean the probability that the output of the Report Noisy Max algorithm is  $i$ , conditioned on  $\xi$ .

We first argue that  $\mathbb{P}[i \mid D, r_{-i}^-] \leq e^{\epsilon_{\text{tr}}} \mathbb{P}[i \mid D', r_{-i}^-] + \delta_{\text{tr}}$ . Define

$$r^* = \min_{r_i} : \lambda_i + r_i > \lambda_j + r_j \quad \forall j \in \arg(r_{-i}^-).$$

Note that, having fixed  $r_{-i}^-$ ,  $i$  will be the output (the  $i$ -th argmax noisy trace) when the dataset is  $D$  if and only if  $r_i \geq r^*$ . We have, for all  $j \in \arg(r_{-i}^-)$ :

$$\begin{aligned} \lambda_i + r^* &> \lambda_j + r_j \\ \Rightarrow (1 + \lambda'_i) + r^* &\geq \lambda_i + r^* > \lambda_j + r_j \geq \lambda'_j + r_j \\ \Rightarrow \lambda'_i + (r^* + 1) &> \lambda'_j + r_j. \end{aligned}$$

Thus, if  $r_i \geq r^* + 1$ , then the  $i$ -th trace will be the  $i$ -th maximum on one side when the dataset is  $D'$  and the noise vector is  $(r_i, r_{-i}^-)$ . The probabilities below are over the choice of  $r_i \sim \text{Gauss}(1/\epsilon_{\text{tr}})$ , then with probability  $1 - \delta_{\text{tr}}$ :

$$\begin{aligned} \mathbb{P}[r_i \geq 1 + r^*] &\geq e^{-\epsilon_{\text{tr}}} \mathbb{P}[r_i \geq r^*] = e^{-\epsilon_{\text{tr}}} \mathbb{P}[i \mid D, r_{-i}^-] \\ \Rightarrow \mathbb{P}[i \mid D', r_{-i}^-] &\geq \mathbb{P}[r_i \geq 1 + r^*] \geq e^{-\epsilon_{\text{tr}}} \mathbb{P}[r_i \geq r^*] = e^{-\epsilon_{\text{tr}}} \mathbb{P}[i \mid D, r_{-i}^-], \end{aligned}$$

which, after multiplying through by  $e^{\epsilon_{\text{tr}}}$  and adding probability  $\delta$  for  $\mathbb{P}[r^* - r_i \geq 1] \leq \delta_{\text{tr}}$ , yields what we wanted to show:

$$\mathbb{P}[i \mid D, r_{-i}^-] \leq e^{\epsilon_{\text{tr}}} \mathbb{P}[i \mid D', r_{-i}^-] + \delta_{\text{tr}}.$$

Then, we argue that  $\mathbb{P}[i \mid D, r_{-i}^+] \leq e^{\epsilon_{\text{tr}}} \mathbb{P}[i \mid D', r_{-i}^+] + \delta_{\text{tr}}$ . Define

$$r^* = \max_{r_i} : \lambda_i + r_i < \lambda_j + r_j \quad \forall j \in \arg(r_{-i}^+).$$

Note that, having fixed  $r_{-i}^+$ ,  $i$  will be the output (the  $i$ -th argmax noisy trace) when the dataset is  $D$  if and only if  $r_i \leq r^*$ . We have, for all  $j \in \arg(r_{-i}^+)$ :

$$\begin{aligned} \lambda_i + r^* &< \lambda_j + r_j \\ \Rightarrow \lambda'_i + r^* &\leq \lambda_i + r^* < \lambda_j + r_j \leq (\lambda'_j + 1) + r_j \\ &\Rightarrow \lambda'_i + (r^* - 1) < \lambda'_j + r_j. \end{aligned}$$

Thus, if  $r_i \leq r^* - 1$ , then the  $i$ -th trace will be the  $i$ -th maximum on the other side when the dataset is  $D'$  and the noise vector is  $(r_i, r_{-i}^+)$ . The probabilities below are over the choice of  $r_i \sim \text{Gauss}(1/\epsilon_{\text{tr}})$ , with probability  $1 - \delta_{\text{tr}}$ , and we have:

$$\begin{aligned} \mathbb{P}[r_i \leq r^* - 1] &\geq e^{-\epsilon_{\text{tr}}} \mathbb{P}[r_i \leq r^*] = e^{-\epsilon_{\text{tr}}} \mathbb{P}[i \mid D, r_{-i}^+] \\ \Rightarrow \mathbb{P}[i \mid D', r_{-i}^+] &\geq \mathbb{P}[r_i \leq r^* - 1] \geq e^{-\epsilon_{\text{tr}}} \mathbb{P}[r_i \leq r^*] = e^{-\epsilon_{\text{tr}}} \mathbb{P}[i \mid D, r_{-i}^+]. \end{aligned}$$

After multiplying through by  $e^{\epsilon_{\text{tr}}}$  and adding probability  $\delta_{\text{tr}}$  for  $\mathbb{P}[r_i - r^* \geq -1] \leq \delta$ , we get:

$$\mathbb{P}[i \mid D, r_{-i}^+] \leq e^{\epsilon_{\text{tr}}} \mathbb{P}[i \mid D', r_{-i}^+] + \delta_{\text{tr}}.$$

Overall, combing the both cases with  $\delta_{\text{tr}} = 2\delta$ , we have

$$\begin{aligned} e^{\epsilon_{\text{tr}}} (\mathbb{P}[i \mid D', r_{-i}^+] + \mathbb{P}[i \mid D', r_{-i}^-]) + \delta_{\text{tr}} &\geq \mathbb{P}[i \mid D, r_{-i}^+] + \mathbb{P}[i \mid D, r_{-i}^-] \\ e^{\epsilon_{\text{tr}}} \mathbb{P}[i \mid D', r_{-i}] + \delta_{\text{tr}} &\geq \mathbb{P}[i \mid D, r_{-i}], \end{aligned}$$

more precisely, we can explicitly bound  $\delta_{\text{tr}}$  to  $\mathcal{O}(\frac{1}{pB})$  by referring to [Zhu & Wang \(2020\)](#).

Using the same approach, we can prove that

$$e^{\epsilon_{\text{tr}}} \mathbb{P}[i \mid D, r_{-i}] + \delta_{\text{tr}} \geq \mathbb{P}[i \mid D', r_{-i}].$$

□

Thus, TraceSorting with Gaussian noise satisfies  $(\epsilon_{\text{tr}}, \delta_{\text{tr}})$ -DP.

**(2)** Secondly, we prove the unified composition of TraceSorting $\circ$ GradientPerturbation is  $(\epsilon_{\text{tr}} + \epsilon_{\text{dp}}, \delta)$ -DP. Based on the results of TraceSorting, we employ two different clipping thresholds for GradientPerturbation.

*Proof.* We define the clipping threshold vector  $c$  for per-sample gradient by TraceSorting, for example, with  $B = 3$  and  $p = 1/3$ , if heavy tailed indicator  $\lambda = [1, 0, 0]$  then  $c = [c_1, c_2, c_2]$ .

$$\begin{aligned} \mathbb{P}[M(D) = Y] &= \mathbb{P}[\text{TraceSorting} = \text{index } i \text{ AND GP} \mid D] \\ &= \int_{-\infty}^{\infty} \mathbb{P}[i \mid D, r_{-i}] \cdot \mathbb{P}[\text{GP with heavy tailed samples } i] dr \\ &= \int_{-\infty}^{\infty} \int_{-\infty}^{\infty} \mathbb{P}[i \mid D, r_{-i}] \cdot \mathbb{P}\left[\frac{1}{B} \left( \sum_{j \in D} g_j + c_j \zeta_j \right) = Y \mid c\right] dr d\zeta \\ &= \int_{-\infty}^{\infty} \int_{-\infty}^{\infty} \mathbb{P}[i \mid D, r_{-i}] \cdot \mathbb{P}[f(D) = Y \mid c] \cdot \mathbb{P}[\zeta = c_j \zeta_j / B] dr d\zeta = *, \end{aligned}$$

where  $r \sim \text{Gauss}(1/\epsilon_{\text{tr}})$  and  $\zeta \sim \text{Gauss}(1/\epsilon_{\text{dp}})$ . We define  $f(\cdot) = \text{GradientDiscent}$  and  $\Delta f = \|f(D) - f(D')\|_2 = \frac{1}{B}(pBc_1 + (1-p)Bc_2) = pc_1 + (1-p)c_2$ . With  $1 - (\delta_{\text{tr}} + \delta_{\text{dp}})$ , we have

$$\begin{aligned} * &= \int_{-\infty}^{\infty} \int_{-\infty}^{\infty} \exp(\epsilon_{\text{tr}}) \mathbb{P}[i \mid D', r_{-i}] \cdot \mathbb{P}\left[\frac{1}{B} \left( \sum_{j \in D'} g_j + c_j \zeta_j \right) = Y \mid c\right] dr d\zeta \\ &= \int_{-\infty}^{\infty} \int_{-\infty}^{\infty} \exp(\epsilon_{\text{tr}}) \mathbb{P}[i \mid D', r_{-i}] \cdot \mathbb{P}[f(D') + c_j \zeta_j / B = Y + \Delta f \mid c] dr d\zeta \\ &= \int_{-\infty}^{\infty} \int_{-\infty}^{\infty} \exp(\epsilon_{\text{tr}}) \mathbb{P}[i \mid D', r_{-i}] \cdot \mathbb{I}[f(D') = Y] \cdot \mathbb{P}[\zeta = c_j \zeta_j / B - \Delta f \mid c] dr d\zeta \\ &\leq \int_{-\infty}^{\infty} \int_{-\infty}^{\infty} \exp(\epsilon_{\text{tr}}) \mathbb{P}[i \mid D', r_{-i}] \cdot \mathbb{I}[f(D') = Y] \cdot \exp(\epsilon_{\text{dp}}) \mathbb{P}[\zeta = c_j \zeta_j / B \mid c] dr d\zeta \\ &\leq \exp(\epsilon_{\text{tr}} + \epsilon_{\text{dp}}) \mathbb{P}[M(D') = Y], \end{aligned}$$

where we have taken into account the randomness of  $c$  through  $r$  with  $\lambda$ , then the first inequality comes from TraceSorting satisfying DP, and the penultimate inequality is derived from the basic Gaussian-based DP mechanism. Thus, define  $\delta = \delta_{\text{tr}} + \delta_{\text{dp}}$ , TraceSorting $\circ$ GradientPerturbation is  $(\epsilon_{\text{tr}} + \epsilon_{\text{dp}}, \delta)$ -DP.  $\square$

(3) Thirdly, we provide the proof that privacy amplification with subsampling still holds with the mechanism  $M$ : TraceSorting $\circ$ GradientPerturbation.

*Proof.* We use  $B \subseteq \{1, \dots, n\}$  to denote the identities of the  $B$ -subsamped samples from  $D = \{z_1, \dots, z_n\}$ . Note that the randomness of  $M'$  includes both the randomness of the random sample  $B$  and the random coins of  $M$ . Let  $D_B$  (or  $D'_B$ ) be a subsample from  $D$  (or  $D'$ ). Let  $Y$  be an arbitrary output range. For convenience, define  $q = B/n$ .

To show  $(q(e^{\epsilon_{\text{tr}} + \epsilon_{\text{dp}}} - 1), q\delta)$ -DP, we have to bound the ratio with  $D' = D \cup i$ :

$$\frac{\mathbb{P}[M'(D) = Y] - q\delta}{\mathbb{P}[M'(D') = Y]} = \frac{q\mathbb{P}[M(D_B) = Y \mid i \in B] + (1 - q)\mathbb{P}[M(D_B) = Y \mid i \notin B] - q\delta}{q\mathbb{P}[M(D'_B) = Y \mid i \in B] + (1 - q)\mathbb{P}[M(D'_B) = Y \mid i \notin B]}$$

by  $e^{q(e^{\epsilon_{\text{tr}} + \epsilon_{\text{dp}}} - 1)}$ . For convenience, define the quantities:

$$\begin{aligned} C &= \mathbb{P}[M(D_B) = Y \mid i \in B] \\ C' &= \mathbb{P}[M(D'_B) = Y \mid i \in B] \\ E &= \mathbb{P}[M(D_B) = Y \mid i \notin B] = \mathbb{P}[M(D'_B) = Y \mid i \notin B] \end{aligned}$$

We can rewrite the ratio as:

$$\frac{\mathbb{P}[M'(D) = Y] - q\delta}{\mathbb{P}[M'(D') = Y]} = \frac{qC + (1 - q)E - q\delta}{qC' + (1 - q)E}$$

Now we use the fact that, by  $(\epsilon_{\text{tr}} + \epsilon_{\text{dp}}, \delta)$ -DP,  $C \leq e^{\epsilon_{\text{tr}} + \epsilon_{\text{dp}}} \min\{C', E\} + \delta$ . The rest is a calculation:

$$\begin{aligned} qC + (1 - q)E - q\delta &\leq q(e^{\epsilon_{\text{tr}} + \epsilon_{\text{dp}}} \min\{C', E\} + \delta) + (1 - q)E - q\delta \\ &= q(\min\{C', E\} + (e^{\epsilon_{\text{tr}} + \epsilon_{\text{dp}}} - 1) \min\{C', E\} + \delta) + (1 - q)E - q\delta \\ &\leq q(\min\{C', E\} + (e^{\epsilon_{\text{tr}} + \epsilon_{\text{dp}}} - 1) \min\{C', E\} + \delta) + (1 - q)E - q\delta \\ &\leq q(C' + (e^{\epsilon_{\text{tr}} + \epsilon_{\text{dp}}} - 1)(qC' + (1 - q)E) + \delta) + (1 - q)E - q\delta \\ &\leq q(C' + (e^{\epsilon_{\text{tr}} + \epsilon_{\text{dp}}} - 1)(qC' + (1 - q)E) + \delta) + (1 - q)E \\ &\leq (1 + q(e^{\epsilon_{\text{tr}} + \epsilon_{\text{dp}}} - 1))(qC' + (1 - q)E). \end{aligned}$$

Thus, we have:

$$\frac{\mathbb{P}[M'(D) = Y] - q\delta}{\mathbb{P}[M'(D') = Y]} \leq q(e^{\epsilon_{\text{tr}} + \epsilon_{\text{dp}}} - 1) \cdot \frac{\mathbb{P}[M(D) = Y]}{\mathbb{P}[M(D') = Y]},$$

and we can derive the simpler conclusion  $(\mathbb{O}(q\epsilon_{\text{tr}} + q\epsilon_{\text{dp}}), \mathbb{O}(q\delta))$ -DP for mechanism  $M'$ , i.e. Subsample $\circ$ TraceSorting $\circ$ GradientPerturbation is  $(\mathbb{O}(q\epsilon_{\text{tr}} + q\epsilon_{\text{dp}}), \mathbb{O}(\delta))$ -DP. Furthermore, according to RenyiDP Mironov (2017) and tCDP Bun et al. (2018), we can calculate the corresponding noise multiplier  $\sigma_{\text{tr}, \text{dp}} = \mathbb{O}\left(\frac{q\sqrt{T \log(1/\delta)}}{\epsilon}\right)$  with  $\epsilon = \epsilon_{\text{tr}}, \epsilon_{\text{dp}}$  for the composition of iterations in model training.  $\square$

To sum up, Theorem 5.1 is proven.

## D SUBSPACE SKEWING FOR IDENTIFICATION

**Theorem D.1 (Subspace Skewing for Identification).** *Assume that the empirical second moment matrix  $M = V_k V_k^T \in \mathbb{R}^{d \times d}$  with  $V_k^T V_k = \mathbb{I}_k$  approximates the population second moment matrix  $\hat{M} = \hat{V}_k \hat{V}_k^T = \mathbb{E}_{V_k \sim \mathcal{D}}[V_k V_k^T]$ ,  $\lambda_{t,i}^{\text{tr}} = \text{tr}(V_k^T \hat{\mathbf{g}}_t(z_i) \hat{\mathbf{g}}_t^T(z_i) V_k)$  and  $\hat{\lambda}_t^{\text{tr}} = \text{tr}(\hat{V}_k^T \hat{\mathbf{g}}_t(z_i) \hat{\mathbf{g}}_t^T(z_i) \hat{V}_k)$ , for any gradient  $\hat{\mathbf{g}}_t(z_i)$  that satisfies  $\|\hat{\mathbf{g}}_t(z_i)\|_2 = 1$ ,  $\zeta_t^{\text{tr}} \sim \mathcal{N}(0, \sigma_{\text{tr}}^2)$ , with probability  $1 - \delta_m - \delta_{\text{tr}}$ , we have*

$$|\lambda_{t,i}^{\text{tr}} - \hat{\lambda}_t^{\text{tr}} + \zeta_t^{\text{tr}}| \leq \frac{4 \log(2d/\delta_m)}{k} + \frac{m_2 \sqrt{B} \log^{\frac{1}{2}}(1/\delta_{\text{tr}})}{d^{\frac{1}{2}}}.$$

*Proof.* For simplicity, we abbreviate  $\hat{\mathbf{g}}_t(z_i)$  as  $\hat{\mathbf{g}}_t$ . Due to the Fact.1,  $V_k^T V_k = \mathbb{I}$  and  $\hat{V}_k^T \hat{V}_k = \mathbb{I}$ , we omit subscripts of expectation and have

$$\begin{aligned} |\lambda_{t,i}^{\text{tr}} - \hat{\lambda}_t^{\text{tr}}| &:= |\text{tr}(V_k^T \hat{\mathbf{g}}_t \hat{\mathbf{g}}_t^T V_k) - \text{tr}(\hat{V}_k^T \hat{\mathbf{g}}_t \hat{\mathbf{g}}_t^T \hat{V}_k)| \\ &= \left| \|V_k^T \hat{\mathbf{g}}_t\|_2^2 - \|\hat{V}_k^T \hat{\mathbf{g}}_t\|_2^2 \right| \\ &= \left| \|V_k V_k^T \hat{\mathbf{g}}_t\|_2^2 - \|\hat{V}_k \hat{V}_k^T \hat{\mathbf{g}}_t\|_2^2 \right| \\ &\leq \|V_k V_k^T \hat{\mathbf{g}}_t - \hat{V}_k \hat{V}_k^T \hat{\mathbf{g}}_t\|_2^2 \\ &\leq \|V_k V_k^T - \hat{V}_k \hat{V}_k^T\|_2^2 \|\hat{\mathbf{g}}_t\|_2^2 \end{aligned} \quad (49)$$

To bound  $\mathbb{E}\|V_k V_k^T - \hat{V}_k \hat{V}_k^T\|_2^2$ , we need to bound the gap between the sum of the random positive semidefinite matrix  $M := V_k V_k^T = \frac{1}{k} \sum_{i=1}^k v_i v_i^T$  and the expectation  $\hat{M} := \hat{V}_k \hat{V}_k^T = \mathbb{E}[V_k V_k^T]$ .

Due to  $\|v_j\|_2 = 1$ , we can easily get

$$\begin{aligned} \|M\|_2 &= \left\| \frac{1}{k} \sum_{i=1}^k v_i v_i^T \right\|_2 \leq \frac{1}{k} \sum_{i=1}^k \|v_i v_i^T\|_2 \\ &= \sup_{x: \|x\|_2=1} \frac{1}{k} \sum_{i=1}^k x^T v_i v_i^T x \\ &= \sup_{x: \|x\|_2=1} \frac{1}{k} \sum_{i=1}^k \langle x, v_i \rangle \\ &\leq \frac{1}{k} \sum_{i=1}^k \|x\|_2 \|v_i\|_2 \\ &= 1 \end{aligned} \quad (50)$$

Thus,  $\|M\|_2 \leq 1$  and  $\|\mathbb{E}M\|_2 = \|M \cdot \mathbb{P}(M)\|_2 \leq 1$  because of  $\mathbb{P}(M) \leq 1$ .

Then, according to Ahlswede-Winter Inequality with  $R = 1$  and  $m = k$ , we have for any  $\mu \in (0, 1)$

$$\mathbb{P}(\|M - \hat{M}\|_2 > \mu) \leq 2d \cdot \exp\left(\frac{-k\mu^2}{4}\right), \quad (51)$$

where  $d$  is dimension of gradients. The inequality shows that the bounded spectral norm of random matrix  $\|M\|_2$  concentrates around its expectation with high probability  $1 - 2d \cdot \exp(-k\mu^2/4)$ .

Since  $\|M\|_2 \in [0, 1]$  and  $\|\mathbb{E}M\|_2 \in [0, 1]$ ,  $\|M - \hat{M}\|_2$  is always bounded by 1. Therefore, for  $\mu \geq 1$ ,  $\|M - \hat{M}\|_2 > \mu$  holds with probability 0. So that for any  $\mu > 0$ , we have

$$\mathbb{P}(\|M - \hat{M}\|_2 > 2\sqrt{\frac{\log 2d}{k}} \mu) \leq \exp(-\mu^2). \quad (52)$$

Based on the inequality above, with probability  $1 - \delta_m$ , we have

$$\|M - \hat{M}\|_2 \leq 2\frac{\log^{\frac{1}{2}}(2d/\delta_m)}{\sqrt{k}}. \quad (53)$$

Next, considering that we have implicitly normalized the term  $\|\hat{\mathbf{g}}_t\|_2^2$  by the threshold 1, the upper bound of  $\|\hat{\mathbf{g}}_t\|_2^2$  is 1. As a result, we obtain

$$\begin{aligned}
|\lambda_{t,i}^{\text{tr}} - \hat{\lambda}_t^{\text{tr}}| &\leq \|V_k V_k^T - \hat{V}_k \hat{V}_k^T\|_2^2 \|\hat{\mathbf{g}}_t\|_2^2 \\
&\leq \|V_k V_k^T - \hat{V}_k \hat{V}_k^T\|_2^2 \\
&\leq \|M - \hat{M}\|_2^2 \\
&\leq \frac{4 \log(2d/\delta_m)}{k},
\end{aligned} \tag{54}$$

with probability  $1 - \delta_m$ .

Due to the shared random subspace of per-sample gradient, the exposed trace may pose potential privacy risks. Thus, we add the noise that satisfies differential privacy to the trace  $\lambda_{t,i}^{\text{tr}}$ , i.e.  $\lambda_{t,i}^{\text{tr}} + \zeta_t^{\text{tr}}$ . The upper bound of the trace for per-sample gradient is limited to 1, because we normalize per-sample gradient in advance. So, the sensitivity in differential privacy can be regarded as 1, which in fact means  $\zeta_t^{\text{tr}} \sim \mathcal{N}(0, \sigma_{\text{tr}}^2 \mathbb{I}_1)$ . Then, applying Gaussian properties, with probability  $1 - \delta_m - \delta_{\text{tr}}$ , we have

$$\begin{aligned}
|\lambda_{t,i}^{\text{tr}} - \hat{\lambda}_t^{\text{tr}} + \zeta_t^{\text{tr}}| &\leq |\lambda_{t,i}^{\text{tr}} - \hat{\lambda}_t^{\text{tr}}| + |\zeta_t^{\text{tr}}| \\
&\leq \frac{4 \log(2d/\delta_m)}{k} + \sigma_{\text{tr}} \log^{\frac{1}{2}}(2/\delta_{\text{tr}}).
\end{aligned} \tag{55}$$

Regarding to  $\sigma_{\text{tr}} = \frac{m_2 \sqrt{TB \log(1/\delta)}}{n \epsilon_{\text{tr}}}$ , we take  $T$  as  $\frac{n \epsilon_{\text{tr}}}{\sqrt{d \log(1/\delta)}}$  to maintain consistency with the context and have

$$\begin{aligned}
|\lambda_{t,i}^{\text{tr}} - \hat{\lambda}_t^{\text{tr}} + \zeta_t^{\text{tr}}| &\leq \frac{4 \log(2d/\delta_m)}{k} + \frac{m_2 \sqrt{B} \log^{\frac{3}{4}}(1/\delta_{\text{tr}})}{d^{\frac{1}{4}} \sqrt{n \epsilon_{\text{tr}}}} \\
&\leq \frac{4 \log(2d/\delta_m)}{k} + \frac{m_2 \sqrt{B} \log^{\frac{1}{2}}(1/\delta_{\text{tr}})}{d^{\frac{1}{2}}},
\end{aligned}$$

where the last inequality holds due to  $T \geq 1$ .

Intuitively, the conclusion tells us that, since  $\lambda_{t,i}^{\text{tr}}$  is a constant, the scale  $\sigma_{\text{tr}} \mathbb{I}_1$  of noise added is actually small compared to the noise  $\sigma_{\text{dp}} \mathbb{I}_d$  added to gradients, where the latter has a tricky dependence on the dimension space  $d$ . Concretely, comparing the first term  $\frac{4 \log(2d/\delta_m)}{k}$ , we observe that in the second term  $\frac{m_2 \sqrt{B} \log^{\frac{1}{2}}(1/\delta_{\text{tr}})}{\sqrt{d}}$ , the model parameter  $d \gg k$ , we concerned in private learning and coupled with noise scale, is in the denominator, which is far better than the factor  $\log(d)$  in the numerator of the first term. Therefore the term  $\frac{4 \log(2d/\delta_m)}{k}$  will dominate the error of subspace skewing, and we can control this part of the error by adopting a larger  $k$ .

In conclusion, for the per-sample trace, there is a high probability  $1 - \delta'_m$ , where  $\delta'_m = \delta_m + \delta_{\text{tr}}$ , that we can accurately identify heavy-tailed samples within a finite and minor error dependent on the factor  $\mathcal{O}(\frac{1}{k})$ .

□

The proof of Theorem 5.2 is completed.

## E CONVERGENCE OF DISCRIMINATIVE CLIPPING

**Theorem E.1 (Convergence of Discriminative Clipping).** *Under Assumptions 3.1, 3.2 and 3.3, let  $\mathbf{w}_t$  be the iterate produced by Algorithm Discriminative Clipping DPSGD with  $T = \mathcal{O}(\frac{n\epsilon}{\sqrt{d \log(1/\delta)}})$ ,  $T \geq 1$  and  $\eta_t = \frac{1}{\sqrt{T}}$ . Define  $\hat{\log}(T/\delta) = \log^{\max(0, \theta-1)}(T/\delta)$ ,  $\hat{\sigma}_{\text{dp}}^2 = m_2 \frac{Tc^2 dB^2 \log(1/\delta)}{n^2 \epsilon^2}$ ,  $a = 2$  if  $\theta = 1/2$ ,  $a = (4\theta)^{2\theta} e^2$  if  $\theta \in (1/2, 1]$  and  $a = (2^{2\theta+1} + 2)\Gamma(2\theta + 1) + \frac{2^{3\theta}\Gamma(3\theta+1)}{3}$  if  $\theta > 1$ , for any  $\delta \in (0, 1)$ , with probability  $1 - \delta$ , then we have:*

(i). **In the heavy tail region** ( $c = c_1$ ):

$$\frac{1}{T} \sum_{t=1}^T \min \{ \|\nabla L_S(\mathbf{w}_t)\|_2, \|\nabla L_S(\mathbf{w}_t)\|_2^2 \} \leq \mathcal{O}\left(\frac{d^{\frac{1}{4}} \log^{\frac{5}{4}}(T/\delta) \hat{\log}(T/\delta) \log^{2\theta}(\sqrt{T})}{(n\epsilon)^{\frac{1}{2}}}\right).$$

(1) If  $\theta = \frac{1}{2}$  and  $K \leq \hat{\sigma}_{\text{dp}}$ , then  $c_1 = \max(4K \log^{\frac{1}{2}}(\sqrt{T}), \frac{16aK \log^{\frac{1}{2}}(1/\delta)}{12})$ . (2) If  $\theta = \frac{1}{2}$  and  $K \geq \hat{\sigma}_{\text{dp}}$ , then  $c_1 = \max(4K \log^{\frac{1}{2}}(\sqrt{T}), 33\sqrt{2a}K \log^{\frac{1}{2}}(2/\delta))$ . (3) If  $\theta > \frac{1}{2}$ , then  $c_1 = \max(4^\theta 2K \log^\theta(\sqrt{T}), 17K \log^\theta(2/\delta))$ .

(ii). **In the light body region** ( $c = c_2$ ):

$$\frac{1}{T} \sum_{t=1}^T \min \{ \|\nabla L_S(\mathbf{w}_t)\|_2, \|\nabla L_S(\mathbf{w}_t)\|_2^2 \} \leq \mathcal{O}\left(\frac{d^{\frac{1}{4}} \log^{\frac{5}{4}}(T/\delta) \log(\sqrt{T})}{(n\epsilon)^{\frac{1}{2}}}\right).$$

(1) If  $K \leq \hat{\sigma}_{\text{dp}}$ , then  $c_2 = \max(2\sqrt{2a}K \log^{\frac{1}{2}}(\sqrt{T}), \frac{16aK \log^{\frac{1}{2}}(1/\delta)}{12})$ . (2) If  $K \geq \hat{\sigma}_{\text{dp}}$ , then  $c_2 = \max(2\sqrt{2a}K \log^{\frac{1}{2}}(\sqrt{T}), 33\sqrt{2a}K \log^{\frac{1}{2}}(2/\delta))$ .

*Proof.* We review two cases in Discriminative Clipping DPSGD:  $\nabla L_S(\mathbf{w}_t) \leq c/2$  and  $\nabla L_S(\mathbf{w}_t) \geq c/2$ . To simplify notation, we write  $\epsilon_{\text{dp}}$  as  $\epsilon$ , omitting the subscript throughout.

Firstly, in the case  $\nabla L_S(\mathbf{w}_t) \leq c/2$ :

$$\begin{aligned} L_S(\mathbf{w}_{t+1}) - L_S(\mathbf{w}_t) &\leq \langle \mathbf{w}_{t+1} - \mathbf{w}_t, \nabla L_S(\mathbf{w}_t) \rangle + \frac{1}{2}\beta \|\mathbf{w}_{t+1} - \mathbf{w}_t\|^2 \\ &\leq -\eta_t \langle \bar{\mathbf{g}}_t - \mathbb{E}_t[\bar{\mathbf{g}}_t], \nabla L_S(\mathbf{w}_t) \rangle - \eta_t \langle \mathbb{E}_t[\bar{\mathbf{g}}_t] - \nabla L_S(\mathbf{w}_t), \nabla L_S(\mathbf{w}_t) \rangle - \eta_t \langle \zeta_t, \nabla L_S(\mathbf{w}_t) \rangle \\ &\quad - \eta_t \|\nabla L_S(\mathbf{w}_t)\|^2 + \frac{1}{2}\beta \eta_t^2 \|\bar{\mathbf{g}}_t\|^2 + \frac{1}{2}\beta \eta_t^2 \|\zeta_t\|^2 + \beta \eta_t^2 \langle \bar{\mathbf{g}}_t, \zeta_t \rangle \end{aligned}$$

Applying the properties of Gaussian tails and Lemma A.2 to  $\zeta_t$ , Lemma A.4 to term  $\sum_{t=1}^T \eta_t \langle \bar{\mathbf{g}}_t - \mathbb{E}_t[\bar{\mathbf{g}}_t], \nabla L_S(\mathbf{w}_t) \rangle$ , with probability  $1 - 4\delta$ , we have

$$\begin{aligned} \sum_{t=1}^T \eta_t \|\nabla L_S(\mathbf{w}_t)\|_2^2 &\leq L_S(\mathbf{w}_1) - L_S(\mathbf{w}_S) + \sum_{t=1}^T \frac{1}{2}\beta \eta_t^2 c^2 + 2\beta m_2 \epsilon d \frac{Tc^2 B^2 \log^2(2/\delta)}{n^2 \epsilon^2} \sum_{t=1}^T \eta_t^2 \\ &\quad + 2\beta \sqrt{\epsilon m_2 T d} \frac{c^2 B \log(2/\delta)}{n\epsilon} \sum_{t=1}^T \eta_t^2 + 2\sqrt{\epsilon m_2 T d} \frac{c^2 B \log(2/\delta)}{n\epsilon} \sum_{t=1}^T \eta_t + \frac{\eta_t c^2 \log(1/\delta)}{\rho} \\ &\quad + \frac{4\rho c^2 \sum_{t=1}^T \eta_t^2 \|\nabla L_S(\mathbf{w}_t)\|_2^2}{\eta_t c^2} - \underbrace{\sum_{t=1}^T \eta_t \langle \mathbb{E}_t[\bar{\mathbf{g}}_t] - \nabla L_S(\mathbf{w}_t), \nabla L_S(\mathbf{w}_t) \rangle}_{\text{Eq.9}}. \end{aligned} \tag{56}$$

We will consider a truncated version of term Eq.9 in the following. Similarly,

$$\sum_{t=1}^T \eta_t \langle \mathbb{E}_t[\bar{\mathbf{g}}_t] - \nabla L_S(\mathbf{w}_t), \nabla L_S(\mathbf{w}_t) \rangle \leq \frac{1}{2} \sum_{t=1}^T \eta_t \|\mathbb{E}_t[\bar{\mathbf{g}}_t] - \nabla L_S(\mathbf{w}_t)\|_2^2 + \frac{1}{2} \sum_{t=1}^T \eta_t \|\nabla L_S(\mathbf{w}_t)\|_2^2.$$



1620 For term  $\|\mathbb{E}_t[\bar{\mathbf{g}}_t] - \nabla L_S(\mathbf{w}_t)\|_2$ , we also define  $a_t = \mathbb{I}_{\|\mathbf{g}_t\|_2 > c}$  and  $b_t = \mathbb{I}_{\|\mathbf{g}_t - \nabla L_S(\mathbf{w}_t)\|_2 > \frac{c}{2}}$ , and  
 1621 have  
 1622

$$\begin{aligned}
 1623 \quad \|\mathbb{E}_t[\bar{\mathbf{g}}_t] - \nabla L_S(\mathbf{w}_t)\|_2 &= \|\mathbb{E}_t[(\bar{\mathbf{g}}_t - \mathbf{g}_t)a_t]\|_2 \\
 1624 &\leq \mathbb{E}_t[\|(\mathbf{g}_t(\frac{c - \|\mathbf{g}_t\|_2}{\|\mathbf{g}_t\|_2})a_t)\|_2] \\
 1625 &\leq \mathbb{E}_t[\|\mathbf{g}_t\|_2 - \|\nabla L_S(\mathbf{w}_t)\|_2 | a_t] \\
 1626 &\leq \mathbb{E}_t[\|\mathbf{g}_t - \nabla L_S(\mathbf{w}_t)\|_2 | b_t] \\
 1627 &\leq \sqrt{\mathbb{E}_t[\|\mathbf{g}_t - \nabla L_S(\mathbf{w}_t)\|_2^2] \mathbb{E}_t b_t^2}. \tag{57}
 \end{aligned}$$

1631 Due to  $\mathbb{E}[\mathbf{g}_t - \nabla L_S(\mathbf{w}_t)] = 0$ , applying Lemma A.7 and A.8 with  
 1632

$$\begin{aligned}
 1633 \quad m &= 1 \\
 1634 \quad \sup_{\eta \in (0,1]} \{v(L, \eta)\} &= aK^2 \\
 1635 \quad x_{\max} &= \frac{\eta I(x)}{x} aK^2 \\
 1636 \quad c_t &\in [\frac{1}{2}, 1] \\
 1637 \quad \eta &= \frac{1}{2}.
 \end{aligned}$$

1638 In the light body region, i.e.  $x \geq x_{\max}$ , we have  
 1639

$$\begin{aligned}
 1640 \quad \mathbb{P}(\|\mathbf{g}_t - \nabla L_S(\mathbf{w}_t)\|_2 > x) &\leq \exp(-c_t \eta I(x)) + \exp(-I(x)) \\
 1641 &\leq \exp(-\frac{1}{4}I(x)) + \exp(-I(x)) \\
 1642 &\leq 2\exp(-\frac{1}{4}I(x)). \tag{58}
 \end{aligned}$$

1643 Then, in the heavy tail region, i.e.  $0 \leq x \leq x_{\max}$ , the inequality  
 1644

$$\begin{aligned}
 1645 \quad \mathbb{P}(\|\mathbf{g}_t - \nabla L_S(\mathbf{w}_t)\|_2 > x) &\leq \exp(-\frac{x^2}{2v(x_{\max}, \eta)}) + m \exp(-\frac{x_{\max}^2(\eta)}{\eta v(x_{\max}, \eta)}) \\
 1646 &\leq 2\exp(-\frac{x^2}{2v(x_{\max}, \eta)}) \\
 1647 &\leq 2\exp(-\frac{x^2}{2aK^2}) \tag{59}
 \end{aligned}$$

1648 holds.  
 1649

1650 Therefore, when  $0 \leq x \leq x_{\max}$ , we have the follow-up truncated conclusions:  
 1651

1652 If  $\theta = \frac{1}{2}$ ,  $\forall \alpha > 0$  and  $a = 2$ , we have the following inequality with probability at least  $1 - \delta$   
 1653

$$1654 \quad \|\mathbf{g}_t - \nabla L_S(\mathbf{w}_t)\|_2 \leq 2K \log^{\frac{1}{2}}(2/\delta).$$

1655 If  $\theta \in (\frac{1}{2}, 1]$ , let  $a = (4\theta)^{2\theta} e^2$ , we have the following inequality with probability at least  $1 - \delta$   
 1656

$$1657 \quad \|\mathbf{g}_t - \nabla L_S(\mathbf{w}_t)\|_2 \leq \sqrt{2}e(4\theta)^\theta K \log^{\frac{1}{2}}(2/\delta).$$

1658 If  $\theta > 1$ , let  $a = (2^{2\theta+1} + 2)\Gamma(2\theta + 1) + \frac{2^{3\theta}\Gamma(3\theta+1)}{3}$ , we have the following inequality with  
 1659 probability at least  $1 - \delta$   
 1660

$$1661 \quad \|\mathbf{g}_t - \nabla L_S(\mathbf{w}_t)\|_2 \leq \sqrt{2(2^{2\theta+1} + 2)\Gamma(2\theta + 1) + \frac{2^{3\theta}\Gamma(3\theta + 1)}{3}} K \log^{\frac{1}{2}}(2/\delta).$$

1674 When  $x \geq x_{\max}$ , let  $I(x) = (x/K)^{\frac{1}{\theta}}$ ,  $\forall \theta \in (\frac{1}{2}, 1]$ , with probability at least  $1 - \delta$ , then we have

$$1676 \quad \|\mathbf{g}_t - \nabla L_S(\mathbf{w}_t)\|_2 \leq 4^\theta K \log^\theta(2/\delta).$$

1677  
1678 Apply the truncated corollary above, when  $0 \leq x \leq x_{\max}$ , we have

$$1680 \quad \mathbb{E}_t[\|\mathbf{g}_t - \nabla L_S(\mathbf{w}_t)\|_2] \leq \sqrt{2aK} \quad (60)$$

1681 and with probability  $1 - \delta$ ,

$$1683 \quad \mathbb{E}_t b_t^2 = \mathbb{P}(\|\mathbf{g}_t - \nabla L_S(\mathbf{w}_t)\|_2 > \frac{c}{2}) \leq 2\exp(-(\frac{c}{2\sqrt{2aK}})^2) \quad (61)$$

1684 where  $a = 2$  if  $\theta = 1/2$ ,  $a = (4\theta)^{2\theta} e^2$  if  $\theta \in (1/2, 1]$  and  $a = (2^{2\theta+1} + 2)\Gamma(2\theta + 1) + \frac{2^{3\theta}\Gamma(3\theta+1)}{3}$  if  $\theta > 1$ .

1688 When  $x \geq x_{\max}$ , the inequalities

$$1690 \quad \mathbb{E}_t[\|\mathbf{g}_t - \nabla L_S(\mathbf{w}_t)\|_2] \leq 4^\theta K \quad (62)$$

1691 and

$$1693 \quad \mathbb{E}_t b_t^2 = \mathbb{P}(\|\mathbf{g}_t - \nabla L_S(\mathbf{w}_t)\|_2 > \frac{c}{2}) \leq 2\exp(-\frac{1}{4}(\frac{c}{2K})^{\frac{1}{\theta}}) \quad (63)$$

1695 hold with probability  $1 - \delta$ , where  $\theta \geq \frac{1}{2}$ .

1697 Thus, with probability  $1 - T\delta$ , we get

$$1699 \quad \sum_{t=1}^T \eta_t \langle \mathbb{E}_t[\bar{\mathbf{g}}_t] - \nabla L_S(\mathbf{w}_t), \nabla L_S(\mathbf{w}_t) \rangle \leq 2aK^2 \sum_{t=1}^T \eta_t \exp(-(\frac{c}{2\sqrt{2aK}})^2) + \frac{1}{2} \sum_{t=1}^T \eta_t \|\nabla L_S(\mathbf{w}_t)\|_2^2, \quad (64)$$

1703 when  $0 \leq x \leq x_{\max}$ .

1704 With probability  $1 - T\delta$ , we obtain

$$1706 \quad \sum_{t=1}^T \eta_t \langle \mathbb{E}_t[\bar{\mathbf{g}}_t] - \nabla L_S(\mathbf{w}_t), \nabla L_S(\mathbf{w}_t) \rangle \leq 4^{2\theta} K^2 \sum_{t=1}^T \eta_t \exp(-\frac{1}{4}(\frac{c}{2K})^{\frac{1}{\theta}}) + \frac{1}{2} \sum_{t=1}^T \eta_t \|\nabla L_S(\mathbf{w}_t)\|_2^2, \quad (65)$$

1710 when  $x \geq x_{\max}$ .

1711 By setting  $\rho = \frac{1}{16}$ ,  $T = \mathcal{O}(\frac{n\epsilon}{\sqrt{d \log(1/\delta)}})$  and  $\eta_t = \frac{1}{\sqrt{T}}$ , with probability  $1 - 4\delta - T\delta$ , we have

$$1714 \quad \frac{1}{4} \sum_{t=1}^T \eta_t \|\nabla L_S(\mathbf{w}_t)\|_2^2 \leq L_S(\mathbf{w}_1) - L_S(\mathbf{w}_S) + \frac{1}{2}\beta c^2 + 2\beta m_2 e \frac{d^{\frac{1}{2}} c^2 B^2 \log^{\frac{3}{2}}(2/\delta)}{n\epsilon} \\ 1715 \quad + 2\beta \sqrt{\epsilon m_2} \frac{d^{\frac{1}{4}} c^2 B \log^{\frac{1}{2}}(2/\delta)}{\sqrt{n\epsilon}} + 2\sqrt{\epsilon m_2} c^2 B \log^{\frac{1}{2}}(2/\delta) + \frac{16d^{\frac{1}{4}} c^2 \log^{\frac{5}{4}}(1/\delta)}{\sqrt{n\epsilon}} \\ 1719 \quad + \text{Eq.10} \begin{cases} 2aK^2 \sum_{t=1}^T \eta_t \exp(-(\frac{c}{2\sqrt{2aK}})^2), & \text{if } 0 \leq x \leq x_{\max}, \\ 4^{2\theta} K^2 \sum_{t=1}^T \eta_t \exp(-\frac{1}{4}(\frac{c}{2K})^{\frac{1}{\theta}}), & \text{if } x \geq x_{\max}. \end{cases} \quad (66)$$

1726 Let the term Eq.10  $\leq \frac{1}{\sqrt{T}}$ , and we have  $c \geq 2\sqrt{2aK} \log^{\frac{1}{2}}(\sqrt{T})$  if  $0 \leq x \leq x_{\max}$  and  $c \geq 4^\theta 2K \log^\theta(\sqrt{T})$  if  $x \geq x_{\max}$ .

In the light body region that  $0 \leq x \leq x_{\max}$ , by taking  $c_2 = c = 2\sqrt{2}aK \log^{\frac{1}{2}}(\sqrt{T})$  we achieve

$$\begin{aligned}
\frac{1}{\sqrt{T}} \sum_{t=1}^T \eta_t \|\nabla L_S(\mathbf{w}_t)\|_2^2 &\leq \frac{4(L_S(\mathbf{w}_1) - L_S(\mathbf{w}_S))}{\sqrt{T}} + \frac{2aK^2}{\sqrt{T}} \\
&+ \frac{8aK^2 \log(\sqrt{T}) \log(2/\delta)}{\sqrt{T}} \left( 2\beta + 8\beta m_2 e B^2 \left( \frac{d^{\frac{1}{4}} \log^{\frac{1}{4}}(2/\delta)}{\sqrt{n\epsilon}} \right)^2 \right. \\
&+ 8\beta \sqrt{em_2} \frac{d^{\frac{1}{4}} B \log^{-\frac{1}{2}}(2/\delta)}{\sqrt{n\epsilon}} + 8\sqrt{em_2} B \log^{-\frac{1}{2}}(2/\delta) + \left. \frac{64d^{\frac{1}{4}} \log^{\frac{1}{4}}(1/\delta)}{\sqrt{n\epsilon}} \right) \\
&\leq \mathbb{O}\left( \frac{\log(\sqrt{T}) \log(1/\delta)}{\sqrt{T}} \cdot \frac{d^{\frac{1}{4}} \log^{\frac{1}{4}}(1/\delta)}{\sqrt{n\epsilon}} \right) \\
&\leq \mathbb{O}\left( \frac{\log(\sqrt{T}) d^{\frac{1}{4}} \log^{\frac{5}{4}}(1/\delta)}{\sqrt{n\epsilon}} \right). \tag{67}
\end{aligned}$$

In the heavy tail region that  $x \geq x_{\max}$ , by taking  $c_1 = c = 4^\theta 2K \log^\theta(\sqrt{T})$  we achieve

$$\begin{aligned}
\frac{1}{\sqrt{T}} \sum_{t=1}^T \eta_t \|\nabla L_S(\mathbf{w}_t)\|_2^2 &\leq \frac{4(L_S(\mathbf{w}_1) - L_S(\mathbf{w}_S))}{\sqrt{T}} + \frac{2aK^2}{\sqrt{T}} \\
&+ \frac{4^{2\theta+1} \log^{2\theta}(\sqrt{T}) \log(2/\delta)}{\sqrt{T}} \left( 2\beta + 8\beta m_2 e B^2 \left( \frac{d^{\frac{1}{4}} \log^{\frac{1}{4}}(2/\delta)}{\sqrt{n\epsilon}} \right)^2 \right. \\
&+ 8\beta \sqrt{em_2} \frac{d^{\frac{1}{4}} B \log^{-\frac{1}{2}}(2/\delta)}{\sqrt{n\epsilon}} + 8\sqrt{em_2} B \log^{-\frac{1}{2}}(2/\delta) + \left. \frac{64d^{\frac{1}{4}} \log^{\frac{1}{4}}(1/\delta)}{\sqrt{n\epsilon}} \right) \\
&\leq \mathbb{O}\left( \frac{\log^{2\theta}(\sqrt{T}) \log(1/\delta)}{\sqrt{T}} \cdot \frac{d^{\frac{1}{4}} \log^{\frac{1}{4}}(1/\delta)}{\sqrt{n\epsilon}} \right) \\
&\leq \mathbb{O}\left( \frac{\log^{2\theta}(\sqrt{T}) d^{\frac{1}{4}} \log^{\frac{5}{4}}(1/\delta)}{\sqrt{n\epsilon}} \right). \tag{68}
\end{aligned}$$

Secondly, we pay extra attention to the bound in the case  $\nabla L_S(\mathbf{w}_t) \geq c/2$ .

$$\begin{aligned}
L_S(\mathbf{w}_{t+1}) - L_S(\mathbf{w}_t) &\leq \langle \mathbf{w}_{t+1} - \mathbf{w}_t, \nabla L_S(\mathbf{w}_t) \rangle + \frac{1}{2} \beta \|\mathbf{w}_{t+1} - \mathbf{w}_t\|_2^2 \\
&\leq \underbrace{-\eta_t \langle \bar{\mathbf{g}}_t + \zeta_t, \nabla L_S(\mathbf{w}_t) \rangle}_{\text{Eq.11}} + \frac{1}{2} \beta \eta_t^2 \|\bar{\mathbf{g}}_t + \zeta_t\|_2^2. \tag{69}
\end{aligned}$$

We revisit term Eq.11 in the case and also set  $s_t^+ = \mathbb{I}_{\|\bar{\mathbf{g}}_t\|_2 \geq c}$  and  $s_t^- = \mathbb{I}_{\|\bar{\mathbf{g}}_t\|_2 \leq c}$ .

$$-\eta_t \langle \bar{\mathbf{g}}_t + \zeta_t, \nabla L_S(\mathbf{w}_t) \rangle = -\eta_t \left\langle \frac{c \bar{\mathbf{g}}_t}{\|\bar{\mathbf{g}}_t\|_2} s_t^+ + \bar{\mathbf{g}}_t s_t^-, \nabla L_S(\mathbf{w}_t) \right\rangle - \eta_t \langle \zeta_t, \nabla L_S(\mathbf{w}_t) \rangle. \tag{70}$$

For term  $-\sum_{t=1}^T \eta_t \langle \mathbf{g}_t s_t^-, \nabla L_S(\mathbf{w}_t) \rangle$ , we obtain

$$\begin{aligned}
-\sum_{t=1}^T \eta_t \langle \mathbf{g}_t s_t^-, \nabla L_S(\mathbf{w}_t) \rangle &= -\sum_{t=1}^T \eta_t s_t^- (\langle \mathbf{g}_t - \nabla L_S(\mathbf{w}_t), \nabla L_S(\mathbf{w}_t) \rangle + \|\nabla L_S(\mathbf{w}_t)\|_2^2) \\
&\leq -\sum_{t=1}^T \eta_t s_t^- \langle \mathbf{g}_t - \nabla L_S(\mathbf{w}_t), \nabla L_S(\mathbf{w}_t) \rangle - \sum_{t=1}^T \eta_t s_t^- \|\nabla L_S(\mathbf{w}_t)\|_2^2 \\
&\leq -\sum_{t=1}^T \eta_t s_t^- \langle \mathbf{g}_t - \nabla L_S(\mathbf{w}_t), \nabla L_S(\mathbf{w}_t) \rangle - \frac{c}{2} \sum_{t=1}^T \eta_t s_t^- \|\nabla L_S(\mathbf{w}_t)\|_2^2 \\
&\leq \underbrace{-\sum_{t=1}^T \eta_t s_t^- \langle \mathbf{g}_t - \nabla L_S(\mathbf{w}_t), \nabla L_S(\mathbf{w}_t) \rangle}_{\text{Eq.12}} - \frac{c}{3} \sum_{t=1}^T \eta_t s_t^- \|\nabla L_S(\mathbf{w}_t)\|_2^2.
\end{aligned} \tag{71}$$

Let consider the term Eq.12. Since  $\mathbb{E}_t[\eta_t s_t^- \langle \mathbf{g}_t - \nabla L_S(\mathbf{w}_t), \nabla L_S(\mathbf{w}_t) \rangle] = 0$ , the sequence  $(-\eta_t s_t^- \langle \mathbf{g}_t - \nabla L_S(\mathbf{w}_t), \nabla L_S(\mathbf{w}_t) \rangle, t \in \mathbb{N})$  is a martingale difference sequence. In addition, the term  $\mathbf{g}_t - \nabla L_S(\mathbf{w}_t)$  is a  $\text{subW}(\theta, K)$  random variable, thus we apply sub-Weibull Freedman inequality with Lemma A.3 and concentration inequality with Lemma A.7 and A.8 to bound it.

In Lemma A.3, Define

$$v(L, \eta) := \mathbb{E}[(X^L - \mathbb{E}[X])^2 \mathbb{I}(X^L \leq \mathbb{E}[X])] + \mathbb{E}[(X^L - \mathbb{E}[X])^2 \exp(\eta(X^L - \mathbb{E}[X])) \mathbb{I}(X^L > \mathbb{E}[X])],$$

and make  $\beta = kv(L, \eta)$ , then we have  $\sup_{\eta \in (0, 1]} \{kv(L, \eta)\} = a \sum_{i=1}^k K_i^2$  based on Lemma A.7 and A.8 in Bakhshizadeh et al. (2023) and obtain

$$\begin{aligned}
\mathbb{P}\left(\bigcup_{k \in \mathbb{N}} \left\{ \sum_{i=1}^k \xi_i \geq kx \text{ and } \sum_{i=1}^k aK_{i-1}^2 \leq \beta \right\}\right) &\leq \exp(-\lambda kx + \frac{\lambda^2}{2} \beta) \\
&= \exp(-\lambda kx + kv(L, \eta) \frac{\lambda^2}{2}).
\end{aligned} \tag{72}$$

Subsequently, we define the inflection point  $x_{\max} := \frac{\eta I(kx)}{kx} a \sum_{i=1}^k K_i^2$  and have

1. In the light body region where  $x \geq x_{\max}$ , we choose  $L = kx$  and  $\lambda = \frac{\eta I(kx)}{kx}$ , that is

$\frac{x}{v(kx, \eta)} \geq \frac{x_{\max}}{v(kx, \eta)} = \frac{\eta I(kx)}{kx}$ . Then the inequality achieves

$$\begin{aligned}
\mathbb{P}\left(\bigcup_{k \in \mathbb{N}} \left\{ \sum_{i=1}^k \xi_i \geq kx \text{ and } \sum_{i=1}^k aK_{i-1}^2 \leq \beta \right\}\right) &\leq \exp(-\eta I(kx) + v(L, \eta) \frac{\eta^2 I^2(kx)}{2kx^2}) \\
&\leq \exp(-\eta I(kx)(1 - v(L, \eta) \frac{\eta I(kx)}{2kx^2})) \\
&\leq \exp(-\eta c_x I(kx)) \\
&\leq \exp(-\frac{1}{2} \eta I(kx)),
\end{aligned} \tag{73}$$

where  $c_x = 1 - \frac{\eta v(kx, \eta) I(kx)}{2kx^2}$  and the last inequality holds due to  $c_x \geq \frac{1}{2}$ .

2. In the heavy tail region where  $x \leq x_{\max}$ , we choose  $L = kx_{\max}$  and  $\lambda = \frac{x}{v(L, \eta)} \leq$

$\frac{x_{\max}}{v(L, \eta)} = \frac{\eta I(L)}{L}$ . Then, we get

$$\begin{aligned}
\mathbb{P}\left(\bigcup_{k \in \mathbb{N}} \left\{ \sum_{i=1}^k \xi_i \geq kx \text{ and } \sum_{i=1}^k aK_{i-1}^2 \leq \beta \right\}\right) &\leq \exp(-\frac{kx^2}{v(L, \eta)} + \frac{kx^2}{2v(L, \eta)}) \\
&\leq \exp(-\frac{kx^2}{2v(L, \eta)}).
\end{aligned} \tag{74}$$

1836 Implementing the above inferences and propositions with  
 1837

$$\begin{aligned}
 1838 \quad \xi_t &= \eta_t \langle \mathbf{g}_t - \nabla L_S(\mathbf{w}_t), \nabla L_S(\mathbf{w}_t) \rangle \\
 1839 \quad \Lambda &:= - \sum_{i=1}^T \eta_t s_t^- \langle \mathbf{g}_t - \nabla L_S(\mathbf{w}_t), \nabla L_S(\mathbf{w}_t) \rangle \\
 1840 \quad K_{t-1} &= \eta_t K \|\nabla L_S(\mathbf{w}_t)\|_2 \\
 1841 \quad m_t &= \eta_t KG \\
 1842 \quad k &= T \\
 1843 \quad \eta &= 1/2
 \end{aligned}$$

1844 If  $\theta = \frac{1}{2}$ ,  $\forall \alpha > 0$  and  $a = 2$ , when  $x \leq x_{\max}$  we have the following inequality with probability at  
 1845 least  $1 - \delta$   
 1846

$$\begin{aligned}
 1847 \quad - \sum_{t=1}^T \eta_t s_t^- \langle \mathbf{g}_t - \nabla L_S(\mathbf{w}_t), \nabla L_S(\mathbf{w}_t) \rangle &\leq \sqrt{2Tv(L, \eta)} \log^{\frac{1}{2}}(1/\delta) \\
 1848 \quad &\leq \sqrt{2a \sum_{t=1}^T K_t^2 \log^{\frac{1}{2}}(1/\delta)} \\
 1849 \quad &\leq 2 \sqrt{\sum_{t=1}^T \eta_t^2 K^2 \|\nabla L_S(\mathbf{w}_t)\|_2^2 \log^{\frac{1}{2}}(1/\delta)} \\
 1850 \quad &\leq 2KG \sqrt{\sum_{t=1}^T \eta_t^2 \log^{\frac{1}{2}}(1/\delta)}, \tag{75}
 \end{aligned}$$

1851 when  $x \geq x_{\max}$ , with  $I(Tx) = (Tx / \sum_{i=1}^T K_i)^2$ , we have  
 1852

$$\begin{aligned}
 1853 \quad - \sum_{t=1}^T \eta_t s_t^- \langle \mathbf{g}_t - \nabla L_S(\mathbf{w}_t), \nabla L_S(\mathbf{w}_t) \rangle &\leq 4^{\frac{1}{2}} \frac{1}{T} \sum_{t=1}^T K_t \log^{\frac{1}{2}}(1/\delta) \\
 1854 \quad &\leq 2 \frac{KG}{T} \sum_{t=1}^T \eta_t \log^{\frac{1}{2}}(1/\delta). \tag{76}
 \end{aligned}$$

1855 If  $\theta \in (\frac{1}{2}, 1]$ , let  $a = (4\theta)^{2\theta} e^2$ , when  $x \leq x_{\max}$  we have the following inequality with probability at  
 1856 least  $1 - \delta$   
 1857

$$\begin{aligned}
 1858 \quad - \sum_{t=1}^T \eta_t s_t^- \langle \mathbf{g}_t - \nabla L_S(\mathbf{w}_t), \nabla L_S(\mathbf{w}_t) \rangle &\leq \sqrt{2a \sum_{t=1}^T K_t^2 \log^{\frac{1}{2}}(1/\delta)} \\
 1859 \quad &\leq \sqrt{2} (4\theta)^\theta e KG \sqrt{\sum_{t=1}^T \eta_t^2 \log^{\frac{1}{2}}(1/\delta)}, \tag{77}
 \end{aligned}$$

1860 when  $x \geq x_{\max}$ , let  $I(Tx) = (Tx / \sum_{i=1}^T K_i)^{\frac{1}{\theta}}$ ,  $\forall \theta \in (\frac{1}{2}, 1]$ , then we have  
 1861

$$\begin{aligned}
 1862 \quad - \sum_{t=1}^T \eta_t s_t^- \langle \mathbf{g}_t - \nabla L_S(\mathbf{w}_t), \nabla L_S(\mathbf{w}_t) \rangle &\leq \frac{4^\theta}{T} \sum_{t=1}^T K_t \log^{\frac{1}{2}}(1/\delta) \\
 1863 \quad &\leq \frac{4^\theta KG}{T} \sum_{t=1}^T \eta_t \log^\theta(1/\delta). \tag{78}
 \end{aligned}$$

If  $\theta > 1$ , let  $a = (2^{2\theta+1} + 2)\Gamma(2\theta + 1) + \frac{2^{3\theta}\Gamma(3\theta+1)}{3}$ , when  $x \leq x_{\max}$  we have the following inequality with probability at least  $1 - 3\delta$

$$\begin{aligned} -\sum_{t=1}^T \eta_t s_t^- \langle \mathbf{g}_t - \nabla L_S(\mathbf{w}_t), \nabla L_S(\mathbf{w}_t) \rangle &\leq \sqrt{2a \sum_{t=1}^T K_t^2 \log^{\frac{1}{2}}(1/\delta)} \\ &\leq \sqrt{2(2^{2\theta+1} + 2)\Gamma(2\theta + 1) + \frac{2^{3\theta}\Gamma(3\theta + 1)}{3}} KG \sqrt{\sum_{t=1}^T \eta_t^2 \log^{\frac{1}{2}}(1/\delta)}, \end{aligned} \quad (79)$$

when  $x \geq x_{\max}$ , let  $I(Tx) = (Tx / \sum_{i=1}^T K_i)^{\frac{1}{\theta}}$ ,  $\forall \theta > 1$ , then we have

$$\begin{aligned} -\sum_{t=1}^T \eta_t s_t^- \langle \mathbf{g}_t - \nabla L_S(\mathbf{w}_t), \nabla L_S(\mathbf{w}_t) \rangle &\leq \frac{4^\theta}{T} \sum_{t=1}^T K_t \log^{\frac{1}{2}}(1/\delta) \\ &\leq \frac{4^\theta KG}{T} \sum_{t=1}^T \eta_t \log^\theta(1/\delta). \end{aligned} \quad (80)$$

To continue the proof, employing Lemma A.5 in term  $-\eta_t \langle \frac{c\mathbf{g}_t}{\|\mathbf{g}_t\|_2} s_t^+, \nabla L_S(\mathbf{w}_t) \rangle$  and covering all  $T$  iterations, we have

$$\begin{aligned} -\sum_{t=1}^T \eta_t \langle \frac{c\mathbf{g}_t}{\|\mathbf{g}_t\|_2} s_t^+, \nabla L_S(\mathbf{w}_t) \rangle &\leq -\frac{c \sum_{t=1}^T \eta_t s_t^+ \|\nabla L_S(\mathbf{w}_t)\|_2}{3} + \frac{8c \sum_{t=1}^T \eta_t \|\mathbf{g}_t - \nabla L_S(\mathbf{w}_t)\|_2}{3} \\ &\leq -\frac{c \sum_{t=1}^T \eta_t (1 - s_t^-) \|\nabla L_S(\mathbf{w}_t)\|_2}{3} \\ &\quad + \frac{16 \sum_{t=1}^T \eta_t \|\mathbf{g}_t - \nabla L_S(\mathbf{w}_t)\|_2 \|\nabla L_S(\mathbf{w}_t)\|_2}{3}. \end{aligned} \quad (81)$$

With the truncated corollaries above, we have

1. If  $0 \leq x \leq x_{\max}$ , with probability at least  $1 - 3\delta$

$$\begin{aligned} -\sum_{t=1}^T \eta_t \langle \frac{c\mathbf{g}_t}{\|\mathbf{g}_t\|_2} s_t^+, \nabla L_S(\mathbf{w}_t) \rangle &\leq -\frac{c \sum_{t=1}^T \eta_t (1 - s_t^-) \|\nabla L_S(\mathbf{w}_t)\|_2}{3} \\ &\quad + \frac{16 \sum_{t=1}^T \eta_t \|\nabla L_S(\mathbf{w}_t)\|_2}{3} \begin{cases} 2K \log^{\frac{1}{2}}(2/\delta), & \text{if } \theta = \frac{1}{2}, \\ \sqrt{2}e(4\theta)^\theta K \log^{\frac{1}{2}}(2/\delta), & \text{if } \theta \in (\frac{1}{2}, 1], \\ \sqrt{2(2^{2\theta+1} + 2)\Gamma(2\theta + 1) + \frac{2^{3\theta}\Gamma(3\theta + 1)}{3}} K \log^{\frac{1}{2}}(2/\delta) & \text{if } \theta > 1. \end{cases} \end{aligned} \quad (82)$$

2. If  $x \geq x_{\max}$  and  $\theta \geq \frac{1}{2}$ , with probability at least  $1 - 3\delta$

$$\begin{aligned} -\sum_{t=1}^T \eta_t \langle \frac{c\mathbf{g}_t}{\|\mathbf{g}_t\|_2} s_t^+, \nabla L_S(\mathbf{w}_t) \rangle &\leq -\frac{c \sum_{t=1}^T \eta_t (1 - s_t^-) \|\nabla L_S(\mathbf{w}_t)\|_2}{3} \\ &\quad + \frac{16 \sum_{t=1}^T \eta_t \|\nabla L_S(\mathbf{w}_t)\|_2}{3} 4^\theta K \log^\theta(2/\delta). \end{aligned} \quad (83)$$

Then, according to Lemma A.1, combining the truncated results of  $-\sum_{t=1}^T \eta_t \langle \mathbf{g}_t s_t^-, \nabla L_S(\mathbf{w}_t) \rangle$  and  $-\sum_{t=1}^T \eta_t \langle \frac{c\mathbf{g}_t}{\|\mathbf{g}_t\|_2} s_t^+, \nabla L_S(\mathbf{w}_t) \rangle$ , we have the inequality:

1944 1. If  $0 \leq x \leq x_{\max}$ , with probability at least  $1 - 3\delta - T\delta$

$$\begin{aligned}
1945 & - \sum_{t=1}^T \eta_t \langle \bar{\mathbf{g}}_t, \nabla L_S(\mathbf{w}_t) \rangle \leq - \frac{c \sum_{t=1}^T \eta_t \|\nabla L_S(\mathbf{w}_t)\|_2}{3} \\
1946 & \\
1947 & \\
1948 & + \begin{cases} 2KG \sqrt{\sum_{t=1}^T \eta_t^2 \log^{\frac{1}{2}}(1/\delta)}, & \text{if } \theta = \frac{1}{2}, \\
1949 & \sqrt{2}(4\theta)^\theta eKG \sqrt{\sum_{t=1}^T \eta_t^2 \log^{\frac{1}{2}}(1/\delta)}, & \text{if } \theta \in (\frac{1}{2}, 1], \\
1950 & \sqrt{2(2^{2\theta+1} + 2)\Gamma(2\theta + 1) + \frac{2^{3\theta}\Gamma(3\theta + 1)}{3}} KG \sqrt{\sum_{t=1}^T \eta_t^2 \log^{\frac{1}{2}}(1/\delta)} & \text{if } \theta > 1. \end{cases} \\
1951 & \\
1952 & \\
1953 & \\
1954 & \\
1955 & \\
1956 & \\
1957 & + \frac{16 \sum_{t=1}^T \eta_t \|\nabla L_S(\mathbf{w}_t)\|_2}{3} \begin{cases} 2K \log^{\frac{1}{2}}(2/\delta), & \text{if } \theta = \frac{1}{2}, \\
1958 & \sqrt{2}e(4\theta)^\theta K \log^{\frac{1}{2}}(2/\delta), & \text{if } \theta \in (\frac{1}{2}, 1], \\
1959 & \sqrt{2(2^{2\theta+1} + 2)\Gamma(2\theta + 1) + \frac{2^{3\theta}\Gamma(3\theta + 1)}{3}} K \log^{\frac{1}{2}}(2/\delta) & \text{if } \theta > 1. \end{cases} \\
1960 & \\
1961 & \\
1962 & \\
1963 & \end{aligned} \tag{84}$$

1965 2. If  $x \geq x_{\max}$  and  $\theta \geq \frac{1}{2}$ , with probability at least  $1 - 3\delta - T\delta$

$$\begin{aligned}
1966 & - \sum_{t=1}^T \eta_t \langle \bar{\mathbf{g}}_t, \nabla L_S(\mathbf{w}_t) \rangle \leq - \frac{c \sum_{t=1}^T \eta_t \|\nabla L_S(\mathbf{w}_t)\|_2}{3} + \frac{4^\theta KG}{T} \sum_{t=1}^T \eta_t \log^\theta(1/\delta) \\
1967 & \\
1968 & \\
1969 & + \frac{16 \sum_{t=1}^T \eta_t \|\nabla L_S(\mathbf{w}_t)\|_2}{3} 4^\theta K \log^\theta(2/\delta). \\
1970 & \\
1971 & \end{aligned} \tag{85}$$

1972 Therefore, we refer to formula.(12) and formula.(13), and apply Lemma A.2 due to  $\zeta_t \sim \mathbb{N}(0, c\sigma_{\text{dp}}\mathbb{I}_d)$ .

1973 Then, to simplify the notation, we define  $\hat{\sigma}_{\text{dp}}^2 = dc^2\sigma_{\text{dp}}^2$ . With  $\hat{\sigma}_{\text{dp}}^2 = m_2 \frac{Tc^2dB^2 \log(1/\delta)}{n^2\epsilon^2}$  and  
1974 probability  $1 - 6\delta - T\delta$ , if  $0 \leq x \leq x_{\max}$ , we have

$$\begin{aligned}
1975 & \\
1976 & \left(\frac{c}{3} - \frac{16}{3}aK \log^{\frac{1}{2}}(2/\delta) - 4\sqrt{e}\hat{\sigma}_{\text{dp}} \log^{\frac{1}{2}}(1/\delta)\right) \sum_{t=1}^T \eta_t \|\nabla L_S(\mathbf{w}_t)\|_2 \leq L_S(\mathbf{w}_1) - L_S(\mathbf{w}_S) \\
1977 & \\
1978 & + (2\beta m_2 ed \frac{Tc^2B^2 \log^2(2/\delta)}{n^2\epsilon^2} + 2\beta \sqrt{em_2Td} \frac{c^2B \log(2/\delta)}{n\epsilon} + \frac{1}{2}\beta c^2) \sum_{t=1}^T \eta_t^2 \\
1979 & \\
1980 & + \sqrt{2a}KG \sqrt{\sum_{t=1}^T \eta_t^2 \log^{\frac{1}{2}}(1/\delta)}, \\
1981 & \\
1982 & \end{aligned} \tag{86}$$

1984 if  $x \leq x_{\max}$ , we have

$$\begin{aligned}
1985 & \\
1986 & \left(\frac{c}{3} - \frac{16}{3}aK \log^\theta(2/\delta) - 4\sqrt{e}\hat{\sigma}_{\text{dp}} \log^{\frac{1}{2}}(1/\delta)\right) \sum_{t=1}^T \eta_t \|\nabla L_S(\mathbf{w}_t)\|_2 \leq L_S(\mathbf{w}_1) - L_S(\mathbf{w}_S) \\
1987 & \\
1988 & + (2\beta m_2 ed \frac{Tc^2B^2 \log^2(2/\delta)}{n^2\epsilon^2} + 2\beta \sqrt{em_2Td} \frac{c^2B \log(2/\delta)}{n\epsilon} + \frac{1}{2}\beta c^2) \sum_{t=1}^T \eta_t^2 \\
1989 & \\
1990 & + \sqrt{2a}KG \sqrt{\sum_{t=1}^T \eta_t^2 \log^\theta(1/\delta)}, \\
1991 & \\
1992 & \end{aligned} \tag{87}$$

1993 where  $a = 2$  if  $\theta = 1/2$ ,  $a = (4\theta)^{2\theta}e^2$  if  $\theta \in (1/2, 1]$  and  $a = (2^{2\theta+1} + 2)\Gamma(2\theta + 1) + \frac{2^{3\theta}\Gamma(3\theta+1)}{3}$   
1994 if  $\theta > 1$ .

1997 Afterwards,

1998 1. In case of light body, when  $0 \leq x \leq x_{\max}$  and  $\theta \geq \frac{1}{2}$ :

1999  
2000 If  $K \geq \hat{\sigma}_{\text{dp}}$ , let  $\frac{c}{3} \geq \frac{33}{3} \sqrt{2aK} \log^{\frac{1}{2}}(2/\delta)$ ,  $T = \mathbb{O}(\frac{n\epsilon}{\sqrt{d \log(1/\delta)}})$  and  $\eta_t = \frac{1}{\sqrt{T}}$ , we obtain

2001  
2002  
2003 
$$\sum_{t=1}^T \eta_t \|\nabla L_S(\mathbf{w}_t)\|_2 \leq \frac{3}{\sqrt{2aK} \log^{\frac{1}{2}}(2/\delta)} (L_S(\mathbf{w}_1) - L_S(\mathbf{w}_S)) + \frac{3\sqrt{2aK}G\sqrt{\sum_{t=1}^T \eta_t^2 \log^{\frac{1}{2}}(1/\delta)}}{\sqrt{2aK} \log^{\frac{1}{2}}(2/\delta)}$$

2004  
2005  
2006 
$$+ \frac{3\sum_{t=1}^T \eta_t^2}{\sqrt{2aK} \log^{\frac{1}{2}}(2/\delta)} \left( 2\beta m_2 e d \frac{T c^2 B^2 \log^2(2/\delta)}{n^2 \epsilon^2} + 2\beta \sqrt{e m_2 T d} \frac{c^2 B \log(2/\delta)}{n\epsilon} + \frac{1}{2} \beta c^2 \right)$$

2007  
2008  
2009 
$$\leq \frac{3(L_S(\mathbf{w}_1) - L_S(\mathbf{w}_S))}{\sqrt{2aK} \log^{\frac{1}{2}}(2/\delta)} + \frac{3\sqrt{2aK}G\log^{\frac{1}{2}}(1/\delta)}{\sqrt{2aK} \log^{\frac{1}{2}}(2/\delta)}$$

2010  
2011  
2012 
$$+ \frac{6\beta e a^2 K^2 \log(2/\delta)}{\sqrt{2aK} \log^{\frac{1}{2}}(2/\delta)} + \frac{6\beta \sqrt{e} \sqrt{2aK} \log^{\frac{1}{2}}(2/\delta)}{\sqrt{2aK} \log^{\frac{1}{2}}(2/\delta)} + \frac{3\beta(33\sqrt{2aK} \log^{\frac{1}{2}}(2/\delta))^2}{2\sqrt{2aK} \log^{\frac{1}{2}}(2/\delta)}. \quad (88)$$

2013

2014 Therefore, with probability at least  $1 - 6\delta - T\delta$ , we have

2015  
2016  
2017 
$$\frac{1}{T} \sum_{t=1}^T \|\nabla L_S(\mathbf{w}_t)\|_2 \leq \mathbb{O}\left(\frac{d^{\frac{1}{4}} \log^{\frac{3}{4}}(1/\delta)}{\sqrt{n\epsilon}}\right),$$

2018  
2019

2020 then, with probability  $1 - \delta$ , we have

2021  
2022 
$$\frac{1}{T} \sum_{t=1}^T \|\nabla L_S(\mathbf{w}_t)\|_2 \leq \mathbb{O}\left(\frac{d^{\frac{3}{4}} \log^{\frac{3}{4}}(T/\delta)}{\sqrt{n\epsilon}}\right). \quad (89)$$

2023  
2024  
2025

2026 If  $K \leq \hat{\sigma}_{\text{dp}}$ , let  $\frac{c}{3} \geq 9\sqrt{e}\hat{\sigma}_{\text{dp}} \log^{\frac{1}{2}}(1/\delta)$ , that is,  $c \geq 27\sqrt{e}\hat{\sigma}_{\text{dp}} \log^{\frac{1}{2}}(1/\delta)$ , thus there exists

2027  $T = \mathbb{O}(\frac{n\epsilon}{\sqrt{d \log(1/\delta)}})$ ,  $T \geq 1$  and  $\eta_t = \frac{1}{\sqrt{T}}$  that we obtain

2028  
2029

2030 
$$\sum_{t=1}^T \eta_t \|\nabla L_S(\mathbf{w}_t)\|_2 \leq \frac{1}{\sqrt{e}\hat{\sigma}_{\text{dp}} \log^{\frac{1}{2}}(1/\delta)} (L_S(\mathbf{w}_1) - L_S(\mathbf{w}_S)) + \frac{\sqrt{2aK}G\sqrt{\sum_{t=1}^T \eta_t^2 \log^{\frac{1}{2}}(1/\delta)}}{\sqrt{e}\hat{\sigma}_{\text{dp}} \log^{\frac{1}{2}}(1/\delta)}$$

2031  
2032  
2033 
$$+ \frac{\sum_{t=1}^T \eta_t^2}{\sqrt{e}\hat{\sigma}_{\text{dp}} \log^{\frac{1}{2}}(1/\delta)} \left( 2\beta m_2 e d \frac{T c^2 B^2 \log^2(2/\delta)}{n^2 \epsilon^2} + 2\beta \sqrt{e m_2 T d} \frac{c^2 B \log(2/\delta)}{n\epsilon} + \frac{1}{2} \beta c^2 \right)$$

2034  
2035  
2036 
$$\leq \frac{L_S(\mathbf{w}_1) - L_S(\mathbf{w}_S)}{\sqrt{e}\hat{\sigma}_{\text{dp}} \log^{\frac{1}{2}}(2/\delta)} + \frac{\sqrt{2aK}G}{\sqrt{e}\hat{\sigma}_{\text{dp}}} + 2\beta e K \log^{\frac{1}{2}}(2/\delta) + 2\beta \sqrt{e} \log^{\frac{1}{2}}(2/\delta) + \beta \frac{(27)^2}{2} K \log^{\frac{1}{2}}(2/\delta).$$

2037  
2038 
$$(90)$$

2039

2040 Therefore, with probability  $1 - 6\delta - T\delta$ , we have

2041  
2042 
$$\frac{1}{T} \sum_{t=1}^T \|\nabla L_S(\mathbf{w}_t)\|_2 \leq \mathbb{O}\left(\frac{d^{\frac{1}{4}} \log^{\frac{3}{4}}(1/\delta)}{\sqrt{n\epsilon}}\right),$$

2043  
2044  
2045

2046 then, with probability  $1 - \delta$ , we have

2047  
2048 
$$\frac{1}{T} \sum_{t=1}^T \|\nabla L_S(\mathbf{w}_t)\|_2 \leq \mathbb{O}\left(\frac{d^{\frac{1}{4}} \log^{\frac{3}{4}}(T/\delta)}{\sqrt{n\epsilon}}\right). \quad (91)$$

2049  
2050  
2051

2. In case of heavy tail, when  $x \geq x_{\max}$ :



If  $\theta = \frac{1}{2}$  and  $K \geq \hat{\sigma}_{\text{dp}}$ , let  $\frac{c}{3} \geq \frac{33}{3} \sqrt{2a} K \log^{\frac{1}{2}}(2/\delta)$ ,  $T = \mathbb{O}(\frac{n\epsilon}{\sqrt{d \log(1/\delta)}})$  and  $\eta_t = \frac{1}{\sqrt{T}}$ , we obtain

$$\begin{aligned}
\sum_{t=1}^T \eta_t \|\nabla L_S(\mathbf{w}_t)\|_2 &\leq \frac{3}{\sqrt{2a} K \log^{\frac{1}{2}}(2/\delta)} (L_S(\mathbf{w}_1) - L_S(\mathbf{w}_S)) + \frac{3\sqrt{2a} K G \sqrt{\sum_{t=1}^T \eta_t^2 \log^{\frac{1}{2}}(1/\delta)}}{\sqrt{2a} K \log^{\frac{1}{2}}(2/\delta)} \\
&+ \frac{3 \sum_{t=1}^T \eta_t^2}{\sqrt{2a} K \log^{\frac{1}{2}}(2/\delta)} \left( 2\beta m_2 e d \frac{T c^2 B^2 \log^2(2/\delta)}{n^2 \epsilon^2} + 2\beta \sqrt{e m_2 T d} \frac{c^2 B \log(2/\delta)}{n \epsilon} + \frac{1}{2} \beta c^2 \right) \\
&\leq \frac{3(L_S(\mathbf{w}_1) - L_S(\mathbf{w}_S))}{\sqrt{2a} K \log^{\frac{1}{2}}(2/\delta)} + \frac{3\sqrt{2a} K G \log^{\frac{1}{2}}(1/\delta)}{\sqrt{2a} K \log^{\frac{1}{2}}(2/\delta)} \\
&+ \frac{6\beta e a^2 K^2 \log(2/\delta)}{\sqrt{2a} K \log^{\frac{1}{2}}(2/\delta)} + \frac{6\beta \sqrt{e} \sqrt{2a} K \log^{\frac{1}{2}}(2/\delta)}{\sqrt{2a} K \log^{\frac{1}{2}}(2/\delta)} + \frac{3\beta (33\sqrt{2a} K \log^{\frac{1}{2}}(2/\delta))^2}{2\sqrt{2a} K \log^{\frac{1}{2}}(2/\delta)}. \tag{92}
\end{aligned}$$

Therefore, with probability at least  $1 - 6\delta - T\delta$ , we have

$$\frac{1}{T} \sum_{t=1}^T \|\nabla L_S(\mathbf{w}_t)\|_2 \leq \mathbb{O}\left(\frac{d^{\frac{1}{4}} \log^{\frac{3}{4}}(1/\delta)}{\sqrt{n\epsilon}}\right),$$

then, with probability  $1 - \delta$ , we have

$$\frac{1}{T} \sum_{t=1}^T \|\nabla L_S(\mathbf{w}_t)\|_2 \leq \mathbb{O}\left(\frac{d^{\frac{3}{4}} \log^{\frac{3}{4}}(T/\delta)}{\sqrt{n\epsilon}}\right). \tag{93}$$

If  $\theta = \frac{1}{2}$  and  $K \leq \hat{\sigma}_{\text{dp}}$ , that is,  $c \geq \frac{16aK \log^{\frac{1}{2}}(1/\delta)}{12}$ , thus there exists  $T = \mathbb{O}(\frac{n\epsilon}{\sqrt{d \log(1/\delta)}})$ ,  $T \geq 1$  and  $\eta_t = \frac{1}{\sqrt{T}}$  that we obtain

$$\begin{aligned}
\sum_{t=1}^T \eta_t \|\nabla L_S(\mathbf{w}_t)\|_2 &\leq \frac{1}{\sqrt{e} \hat{\sigma}_{\text{dp}} \log^{\frac{1}{2}}(1/\delta)} (L_S(\mathbf{w}_1) - L_S(\mathbf{w}_S)) + \frac{\sqrt{2a} K G \sqrt{\sum_{t=1}^T \eta_t^2 \log^{\frac{1}{2}}(1/\delta)}}{\sqrt{e} \hat{\sigma}_{\text{dp}} \log^{\frac{1}{2}}(1/\delta)} \\
&+ \frac{\sum_{t=1}^T \eta_t^2}{\sqrt{e} \hat{\sigma}_{\text{dp}} \log^{\frac{1}{2}}(1/\delta)} \left( 2\beta m_2 e d \frac{T c^2 B^2 \log^2(2/\delta)}{n^2 \epsilon^2} + 2\beta \sqrt{e m_2 T d} \frac{c^2 B \log(2/\delta)}{n \epsilon} + \frac{1}{2} \beta c^2 \right) \\
&\leq \frac{L_S(\mathbf{w}_1) - L_S(\mathbf{w}_S)}{\sqrt{e} \hat{\sigma}_{\text{dp}} \log^{\frac{1}{2}}(2/\delta)} + \frac{\sqrt{2a} K G}{\sqrt{e} \hat{\sigma}_{\text{dp}}} + 2\beta e K \log^{\frac{1}{2}}(2/\delta) + 2\beta \sqrt{e} \log^{\frac{1}{2}}(2/\delta) + \beta \frac{(27)^2}{2} K \log^{\frac{1}{2}}(2/\delta). \tag{94}
\end{aligned}$$

Therefore, with probability  $1 - 6\delta - T\delta$ , we have

$$\frac{1}{T} \sum_{t=1}^T \|\nabla L_S(\mathbf{w}_t)\|_2 \leq \mathbb{O}\left(\frac{d^{\frac{1}{4}} \log^{\frac{3}{4}}(1/\delta)}{\sqrt{n\epsilon}}\right),$$

then, with probability  $1 - \delta$ , we have

$$\frac{1}{T} \sum_{t=1}^T \|\nabla L_S(\mathbf{w}_t)\|_2 \leq \mathbb{O}\left(\frac{d^{\frac{1}{4}} \log^{\frac{3}{4}}(T/\delta)}{\sqrt{n\epsilon}}\right). \tag{95}$$

If  $\theta > \frac{1}{2}$ , then term  $\log^\theta(2/\delta)$  dominates the inequality. Let  $\frac{c}{3} \geq \frac{17}{3}K \log^\theta(2/\delta)$ ,  $T = \mathcal{O}(\frac{n\epsilon}{\sqrt{d \log(1/\delta)}})$  and  $\eta_t = \frac{1}{\sqrt{T}}$ , we obtain

$$\begin{aligned} \sum_{t=1}^T \eta_t \|\nabla L_S(\mathbf{w}_t)\|_2 &\leq \frac{3}{\sqrt{2aK \log^\theta(2/\delta)}} (L_S(\mathbf{w}_1) - L_S(\mathbf{w}_S)) + \frac{3\sqrt{2a}KG \sqrt{\sum_{t=1}^T \eta_t^2 \log^\theta(1/\delta)}}{\sqrt{2aK \log^\theta(2/\delta)}} \\ &+ \frac{3 \sum_{t=1}^T \eta_t^2}{\sqrt{2aK \log^\theta(2/\delta)}} \left( 2\beta m_2 e d \frac{T c^2 B^2 \log^2(2/\delta)}{n^2 \epsilon^2} + 2\beta \sqrt{e m_2 T d} \frac{c^2 B \log(2/\delta)}{n \epsilon} + \frac{1}{2} \beta c^2 \right) \\ &\leq \frac{3(L_S(\mathbf{w}_1) - L_S(\mathbf{w}_S))}{\sqrt{2aK \log^\theta(2/\delta)}} + 3G + \frac{16^2}{24} \beta K \log^\theta(2/\delta) + 136\beta K \log^\theta(2/\delta) + 3\beta(17)^2 K \log^\theta(2/\delta). \end{aligned} \quad (96)$$

As a result, with probability  $1 - \delta$ , we have

$$\frac{1}{T} \sum_{t=1}^T \|\nabla L_S(\mathbf{w}_t)\|_2 \leq \mathcal{O}\left(\frac{\log^\theta(T/\delta) d^{\frac{1}{4}} \log^{\frac{1}{4}}(T/\delta)}{\sqrt{n\epsilon}}\right). \quad (97)$$

Consequently, integrate the above results on the condition that  $\nabla L_S(\mathbf{w}_t) \geq c/2$ .

For light body, we have

$$\frac{1}{T} \sum_{t=1}^T \|\nabla L_S(\mathbf{w}_t)\|_2 \leq \mathcal{O}\left(\frac{d^{\frac{1}{4}} \log^{\frac{3}{4}}(T/\delta)}{\sqrt{n\epsilon}}\right), \quad (98)$$

For heavy tail, we have

$$\frac{1}{T} \sum_{t=1}^T \|\nabla L_S(\mathbf{w}_t)\|_2 \leq \mathcal{O}\left(\frac{d^{\frac{1}{4}} \log^{\theta+\frac{1}{4}}(T/\delta)}{\sqrt{n\epsilon}}\right), \quad (99)$$

with probability  $1 - \delta$  and  $\theta \geq \frac{1}{2}$ .

In a word, covering the two cases, we ultimately come to the conclusion with probability  $1 - \delta$ ,  $T = \mathcal{O}(\frac{n\epsilon}{\sqrt{d \log(1/\delta)}})$ ,  $T \geq 1$  and  $\eta_t = \frac{1}{\sqrt{T}}$ :

### 1. In the heavy tail region:

$$\begin{aligned} \frac{1}{T} \sum_{t=1}^T \min \{ \|\nabla L_S(\mathbf{w}_t)\|_2, \|\nabla L_S(\mathbf{w}_t)\|_2^2 \} &\leq \mathcal{O}\left(\frac{d^{\frac{1}{4}} \log^{\theta+\frac{1}{4}}(T/\delta)}{(n\epsilon)^{\frac{1}{2}}}\right) + \mathcal{O}\left(\frac{d^{\frac{1}{4}} \log^{2\theta}(\sqrt{T}) \log^{\frac{5}{4}}(T/\delta)}{(n\epsilon)^{\frac{1}{2}}}\right) \\ &\leq \mathcal{O}\left(\frac{d^{\frac{1}{4}} \log^{\frac{1}{4}}(T/\delta) (\log^\theta(T/\delta) + \log^{2\theta}(\sqrt{T}) \log(T/\delta))}{(n\epsilon)^{\frac{1}{2}}}\right) \\ &\leq \mathcal{O}\left(\frac{d^{\frac{1}{4}} \log^{\frac{5}{4}}(T/\delta) \hat{\log}(T/\delta) \log^{2\theta}(\sqrt{T})}{(n\epsilon)^{\frac{1}{2}}}\right), \end{aligned} \quad (100)$$

where  $\hat{\log}(T/\delta) = \log^{\max(0, \theta-1)}(T/\delta)$ . If  $\theta = \frac{1}{2}$  and  $K \leq \hat{\sigma}_{\text{dp}}$ , then  $c_1 = \max(4^\theta 2K \log^\theta(\sqrt{T}), \frac{16aK \log^{\frac{1}{2}}(1/\delta)}{12})$ . If  $\theta = \frac{1}{2}$  and  $K \geq \hat{\sigma}_{\text{dp}}$ , then  $c_1 = \max(4^\theta 2K \log^\theta(\sqrt{T}), 33\sqrt{2a}K \log^{\frac{1}{2}}(2/\delta))$ . If  $\theta > \frac{1}{2}$ , then  $c_1 = \max(4^\theta 2K \log^\theta(\sqrt{T}), 17K \log^\theta(2/\delta))$ .

### 2. In the light body region:

$$\begin{aligned} \frac{1}{T} \sum_{t=1}^T \min \{ \|\nabla L_S(\mathbf{w}_t)\|_2, \|\nabla L_S(\mathbf{w}_t)\|_2^2 \} &\leq \mathcal{O}\left(\frac{d^{\frac{1}{4}} \log^{\frac{3}{4}}(T/\delta)}{(n\epsilon)^{\frac{1}{2}}}\right) + \mathcal{O}\left(\frac{d^{\frac{1}{4}} \log(\sqrt{T}) \log^{\frac{5}{4}}(T/\delta)}{(n\epsilon)^{\frac{1}{2}}}\right) \\ &\leq \mathcal{O}\left(\frac{d^{\frac{1}{4}} \log^{\frac{1}{4}}(T/\delta) (\log^{\frac{1}{2}}(T/\delta) + \log(\sqrt{T}) \log(T/\delta))}{(n\epsilon)^{\frac{1}{2}}}\right) \\ &\leq \mathcal{O}\left(\frac{d^{\frac{1}{4}} \log^{\frac{5}{4}}(T/\delta) \log(\sqrt{T})}{(n\epsilon)^{\frac{1}{2}}}\right), \end{aligned} \quad (101)$$

2160 where  $\hat{\log}(T/\delta) = \log^{\max(0, \theta-1)}(T/\delta)$ . If  $\theta = \frac{1}{2}$  and  $K \leq \hat{\sigma}_{\text{dp}}$ , then  
 2161  
 2162  $c_2 = \max\left(2\sqrt{2a}K \log^\theta(\sqrt{T}), \frac{16aK \log^{\frac{1}{2}}(1/\delta)}{12}\right)$ . If  $\theta = \frac{1}{2}$  and  $K \geq \hat{\sigma}_{\text{dp}}$ ,  
 2163 then  $c_2 = \max\left(2\sqrt{2a}K \log^\theta(\sqrt{T}), 33\sqrt{2a}K \log^{\frac{1}{2}}(2/\delta)\right)$ . If  $\theta > \frac{1}{2}$ , then  $c_2 =$   
 2164  $\max\left(2\sqrt{2a}K \log^\theta(\sqrt{T}), 17K \log^\theta(2/\delta)\right)$ .  
 2165

□

2166  
 2167 The proof of Theorem 5.3 is completed.  
 2168  
 2169  
 2170  
 2171  
 2172  
 2173  
 2174  
 2175  
 2176  
 2177  
 2178  
 2179  
 2180  
 2181  
 2182  
 2183  
 2184  
 2185  
 2186  
 2187  
 2188  
 2189  
 2190  
 2191  
 2192  
 2193  
 2194  
 2195  
 2196  
 2197  
 2198  
 2199  
 2200  
 2201  
 2202  
 2203  
 2204  
 2205  
 2206  
 2207  
 2208  
 2209  
 2210  
 2211  
 2212  
 2213

## F UNIFORM BOUND FOR DISCRIMINATIVE CLIPPING DPSGD

**Theorem F.1 (Uniform Bound for Discriminative Clipping DPSGD).** *Under Assumptions 3.1, 3.2 and 3.3, combining Theorem 2 and Theorem 3, for any  $\delta' \in (0, 1)$ , with probability  $1 - \delta'$ , we have*

$$\begin{aligned} \frac{1}{T} \sum_{t=1}^T \min \{ \|\nabla L_S(\mathbf{w}_t)\|_2, \|\nabla L_S(\mathbf{w}_t)\|_2^2 \} &\leq p * \mathbb{O}\left(\frac{d^{\frac{1}{4}} \log^{\frac{5}{4}}(T/\delta) \hat{\log}(T/\delta) \log^{2\theta}(\sqrt{T})}{(n\epsilon)^{\frac{1}{2}}}\right) \\ &+ (1-p) * \mathbb{O}\left(\frac{d^{\frac{1}{4}} \log^{\frac{5}{4}}(T/\delta) \log(\sqrt{T})}{(n\epsilon)^{\frac{1}{2}}}\right), \end{aligned}$$

where  $\delta' = \delta'_m + \delta$ ,  $\hat{\log}(T/\delta) = \log^{\max(0, \theta-1)}(T/\delta)$  and  $p$  is ratio of heavy-tailed samples.

*Proof.* We combine the subspace skewing error (Theorem 5.2) with the optimization bound of Discriminative Clipping DPSGD (Theorem 5.3) in this section to align with our algorithm outline. We have already discussed the error of traces in previous chapters and considered the condition of additional noise that satisfies DP, obtaining an upper bound on the error that depends on the factor  $\mathbb{O}(\frac{1}{k})$ . This conclusion means that, under the high probability guarantee of  $1 - \delta'_m$ , we can accurately identify the trace of the per-sample gradient with minimal error, and classify gradients into the light body and heavy tail based on the metric.

Specifically, based on statistical characteristics, approximately 5% -10% of the data will fall into the tail part. Thus, we select the top  $p\%$  samples in the trace ranking as the tailed samples, where  $p \in [5\%, 10\%]$ . Although a subsampling strategy is used, uniform sampling does not change the proportion of tail samples in the batch. Furthermore, based on the relationship between trace and variance, the  $pB$ -th of sorted trace  $\lambda_t^{\text{tr}, p}$  can be seen as the inflection point  $x_{\max}$  of distribution defined in truncated theories A.7 and A.8, which corresponds to the empirical sample results with theoretical population variance and the approximation error has bounded in Theorem 5.2. Therefore, in discriminative clipping DPSGD, we can accurately partition the sample into the heavy-tailed convergence bound with a high probability of  $(1 - \delta'_m) * p$ , and exactly induce the sample to the bound of light bodies with a high probability of  $(1 - \delta'_m) * (1 - p)$ , while there is a discrimination error with probability  $\delta'_m$ . Accordingly, we have

$$\begin{aligned} C_u(c_1, c_2) &:= \frac{1}{T} \sum_{t=1}^T \min \{ \|\nabla L_S(\mathbf{w}_t)\|_2, \|\nabla L_S(\mathbf{w}_t)\|_2^2 \} \\ &= (1 - \delta'_m) * p * C_{\text{tail}}(c_1) + (1 - \delta'_m) * (1 - p) * C_{\text{body}}(c_2) + \delta'_m * |C_{\text{tail}}(c_1) - C_{\text{body}}(c_2)|. \end{aligned} \quad (102)$$

where  $C_{\text{tail}}(c_1)$  means the convergence bound of  $\frac{1}{T} \sum_{t=1}^T \min \{ \|\nabla L_S(\mathbf{w}_t)\|_2, \|\nabla L_S(\mathbf{w}_t)\|_2^2 \}$  when  $\lambda_t^{\text{tr}, i} \geq \lambda_t^{\text{tr}, p}$ , i.e.  $\mathbb{O}\left(\frac{d^{\frac{1}{4}} \log^{\frac{5}{4}}(T/\delta) \hat{\log}(1/\delta) \log^{2\theta}(\sqrt{T})}{(n\epsilon)^{\frac{1}{2}}}\right)$ ,  $C_{\text{body}}(c_2)$  denotes the bound of  $\frac{1}{T} \sum_{t=1}^T \min \{ \|\nabla L_S(\mathbf{w}_t)\|_2, \|\nabla L_S(\mathbf{w}_t)\|_2^2 \}$  when  $0 \leq \lambda_t^{\text{tr}, i} \leq \lambda_t^{\text{tr}, p}$  i.e.  $\mathbb{O}\left(\frac{d^{\frac{1}{4}} \log^{\frac{5}{4}}(T/\delta) \log(\sqrt{T})}{(n\epsilon)^{\frac{1}{2}}}\right)$ , with  $c_1 = 4^\theta 2K \log^\theta(\sqrt{T})$  and  $c_2 = 2\sqrt{2a}K \log^{\frac{1}{2}}(\sqrt{T})$ .

If  $\theta = \frac{1}{2}$ , then  $C_{\text{tail}}(c_1) = C_{\text{body}}(c_2)$  and  $\delta'_m \rightarrow 0$ , thus we have

$$C_u(c_1, c_2) = C_{\text{tail}}(c_1) = \mathbb{O}\left(\frac{d^{\frac{1}{4}} \log^{\frac{5}{4}}(T/\delta) \log(\sqrt{T})}{(n\epsilon)^{\frac{1}{2}}}\right). \quad (103)$$

If  $\theta > \frac{1}{2}$ , then  $C_{\text{tail}}(c_1) \geq C_{\text{body}}(c_2)$ , and we need to proof that  $C_{\text{tail}}(c_1) \geq C_u(c_1, c_2)$ , i.e.

$$\begin{aligned} C_{\text{tail}}(c_1) &\geq C_u(c_1, c_2) \\ &\geq (1 - \delta'_m) * p * C_{\text{tail}}(c_1) + (1 - \delta'_m) * (1 - p) * C_{\text{body}}(c_2) + \delta'_m * |C_{\text{tail}}(c_1) - C_{\text{body}}(c_2)|. \end{aligned}$$

By transposition, we have

$$(1 - \delta'_m)(1 - p) * C_{\text{tail}}(c_1) + \delta'_m * C_{\text{body}}(c_2) \geq (1 - \delta'_m) * (1 - p) * C_{\text{body}}(c_2).$$

2268 Then, we have  
2269

$$2270 C_{\text{tail}}(c_1) \geq C_{\text{body}}(c_2) - \frac{\delta'_m}{(1 - \delta'_m) * (1 - p)} C_{\text{body}}(c_2), \quad (104)$$

2271  
2272 due to  $\frac{\delta'_m}{(1 - \delta'_m) * (1 - p)} \geq 0$ , it is proved that  $C_{\text{tail}}(c_1) \geq C_u(c_1, c_2)$ .  
2273

2274 From another perspective, for  $C_u(c_1, c_2)$ , with probability  $1 - \delta'_m$ , we have  
2275

$$2276 C_u(c_1, c_2) = p * C_{\text{tail}}(c_1) + *(1 - p) * C_{\text{body}}(c_2). \quad (105)$$

2277 In other words, for the formula.(102), we define  $\delta' = \delta'_m + \delta$ . Then, with probability  $1 - \delta'$ , we have  
2278

$$2279 \frac{1}{T} \sum_{t=1}^T \min \{ \|\nabla L_S(\mathbf{w}_t)\|_2, \|\nabla L_S(\mathbf{w}_t)\|_2^2 \} \leq p * \mathbb{O}\left(\frac{d^{\frac{1}{4}} \log^{\frac{5}{4}}(T/\delta) \hat{\log}(T/\delta) \log^{2\theta}(\sqrt{T})}{(n\epsilon)^{\frac{1}{2}}}\right) \\ 2280 \\ 2281 \\ 2282 + (1 - p) * \mathbb{O}\left(\frac{d^{\frac{1}{4}} \log^{\frac{5}{4}}(T/\delta) \log(\sqrt{T})}{(n\epsilon)^{\frac{1}{2}}}\right) \quad (106) \\ 2283 \\ 2284$$

2285 where  $\hat{\log}(T/\delta) = \log^{\max(0, \theta - 1)}(T/\delta)$ .  
2286

□

2287  
2288 The proof of Theorem 5.4 is completed.  
2289  
2290  
2291  
2292  
2293  
2294  
2295  
2296  
2297  
2298  
2299  
2300  
2301  
2302  
2303  
2304  
2305  
2306  
2307  
2308  
2309  
2310  
2311  
2312  
2313  
2314  
2315  
2316  
2317  
2318  
2319  
2320  
2321

## G SUPPLEMENTAL EXPERIMENTS

### G.1 IMPLEMENTATION DETAILS AND CODEBASE

All experiments are conducted on a server with an Intel(R) Xeon(R) E5-2640 v4 CPU at 2.40GHz and a NVIDIA Tesla P40 GPU running on Ubuntu. By default, we uniformly set subspace dimension  $k = 200$ ,  $\epsilon = \epsilon_{tr} + \epsilon_{dp}$  with  $\epsilon_{tr} = \epsilon_{dp}$ ,  $p = 10\%$  and sub-Weibull index  $\theta = 2$  for any datasets. In particular, we use the LDAM [Cao et al. \(2019\)](#) loss function for heavy-tailed tasks.

1. **MNIST**: MNIST has ten categories, 60,000 training samples and 10,000 testing samples. We construct a two-layer CNN network and replace the BatchNorm of the convolutional layer with GroupNorm. We set 40 epochs, 128 batchsize, 0.1 small clipping threshold, 1 large clipping threshold, and 1 learning rate.
2. **FMNIST**: FMNIST has ten categories, 60,000 training samples and 10,000 testing samples. we use the same two-layer CNN architecture, and the other hyperparameters are the same as MNIST.
3. **CIFAR10**: CIFAR10 has 50,000 training samples and 10,000 testing. We set 50 epoch, 256 batchsize, 0.1 small clipping threshold and 1 large clipping threshold with model SimCLRv2 [Tramer & Boneh \(2021\)](#) pre-trained by unlabeled ImageNet. We refer the code for pre-trained SimCLRv2 to <https://github.com/ptramer/Handcrafted-DP>.
4. **CIFAR10-HT**: CIFAR10-HT contains  $32 \times 32$  pixel 12,406 training data and 10,000 testing data, and the proportion of 10 classes in training data is as follows: [0:5000, 1:2997, 2:1796, 3:1077, 4:645, 5:387, 6:232, 7:139, 8:83, 9:50]. We train CIFAR10-HT on model ResNeXt-29 [Xie et al. \(2017\)](#) pre-trained by CIFAR100 with the same parameters as CIFAR10. We can see pre-trained ResNeXt in <https://github.com/ptramer/Handcrafted-DP> and CIFAR10-HT with LDAM-DRW loss function in <https://github.com/kaidic/LDAM-DRW>.
5. **ImageNette**: ImageNette is a 10-subclass set of ImageNet and contains 9469 training examples and 3925 testing examples. We train on model ResNet-9 [He et al. \(2016\)](#) without pre-train and set 1000 batchsize, 0.15 small clipping threshold, 1.5 large clipping threshold and 0.0001 learning rate with 50 runs.
6. **ImageNette-HT**: We construct the heavy-tailed version of ImageNette by the method in [Cao et al. \(2019\)](#). ImageNette-HT contains 2345 training data and 3925 testing data, which is difficult to train, and proportion of 10 classes in training data follows: [0:946, 1:567, 2:340, 3:204, 4:122, 5:73, 6:43, 7:26, 8:15, 9:9]. The other settings are the same as ImageNette. Our ResNet-9 refers to <https://github.com/cbenitez81/Resnet9/> with 2.5M network parameters.
7. **E2E**: We have conducted experiments on transform-based NLP tasks for the dataset E2E with BLEU metric and GPT-2 model, which generates natural language from tabular data in the catering industry. We adopt the DPAdam optimizer and use the same settings as ?, where small clipping threshold  $c_2 = 0.1$  and large clipping threshold  $c_1 = 10 * c_2$ .

Moreover, we open our source code and implementation details for discriminative clipping on the following link: <https://anonymous.4open.science/r/DC-DPSGD-N-25C9/>.

2376  
2377  
2378  
2379  
2380  
2381  
2382  
2383  
2384  
2385  
2386  
2387  
2388  
2389  
2390  
2391  
2392  
2393  
2394  
2395  
2396  
2397  
2398  
2399  
2400  
2401  
2402  
2403  
2404  
2405  
2406  
2407  
2408  
2409  
2410  
2411  
2412  
2413  
2414  
2415  
2416  
2417  
2418  
2419  
2420  
2421  
2422  
2423  
2424  
2425  
2426  
2427  
2428  
2429

## G.2 EFFECTS OF PARAMETERS ON TEST ACCURACY

Due to space limitations, we place the remaining ablation study on MNIST, FMNIST, ImageNette and ImageNette-HT in Table 5 and Table 6. We acknowledge that since ImageNette-HT has only 2,345 training data, which is one-fifth of ImageNette, it is difficult to support the convergence of the model. In the future, we will improve this aspect in our work.

Table 5: Effects of parameters on test accuracy with MNIST and FMNIST.

| Dataset | Subspace- $k$ |       |       |       | $\epsilon_{tr} + \epsilon_{dp}$ |       |       | sub-Weibull- $\theta$ |       |       |
|---------|---------------|-------|-------|-------|---------------------------------|-------|-------|-----------------------|-------|-------|
|         | None          | 100   | 150   | 200   | 2+6                             | 4+4   | 6+2   | 1/2                   | 1     | 2     |
| MNIST   | 98.16         | 98.48 | 98.66 | 98.72 | 98.78                           | 98.72 | 98.42 | 98.61                 | 98.69 | 98.72 |
| FMNIST  | 85.78         | 87.61 | 87.71 | 87.80 | 87.70                           | 87.80 | 87.26 | 87.40                 | 87.55 | 87.80 |

Table 6: Effects of parameters on test accuracy with ImageNette and ImageNette-HT.

| Dataset       | Subspace- $k$ |       |       |       | $\epsilon_{tr} + \epsilon_{dp}$ |       |       | sub-Weibull- $\theta$ |       |       |
|---------------|---------------|-------|-------|-------|---------------------------------|-------|-------|-----------------------|-------|-------|
|               | None          | 100   | 150   | 200   | 2+6                             | 4+4   | 6+2   | 1/2                   | 1     | 2     |
| ImageNette    | 66.08         | 68.34 | 69.00 | 69.29 | 68.54                           | 69.29 | 68.12 | 67.91                 | 68.87 | 69.29 |
| ImageNette-HT | 29.33         | 31.44 | 33.17 | 33.70 | 34.25                           | 33.70 | 31.13 | 33.05                 | 33.37 | 33.70 |

To investigate the effect of  $p$ , we have added a set of new experiments by varying  $p \in [1\%, 20\%]$ . The results are presented in Table 7. We observe that the test accuracy is minimally affected when  $p$  is less than 10%, but shows a negative impact at around 20%. We believe that the proportion of heavy-tailed samples aligns with statistical expectations. Assigning larger clipping thresholds to more light-body samples introduces more noise, while conservatively estimating heavy-tails does not fully exploit the algorithm’s potential.

Table 7: Effects of parameter on  $p$ .

| Dataset    | Heavy tail ratio- $p$ |       |       |       |       |
|------------|-----------------------|-------|-------|-------|-------|
|            | 20%                   | 10%   | 5%    | 2%    | 1%    |
| ImageNette | 66.82                 | 69.29 | 68.44 | 68.45 | 68.75 |
